# Supplementary material for: Trends in antiepileptic drug treatment and effectiveness in clinical practice in England from 2003 to 2016: a retrospective cohort study using electronic medical records
Source: PubMed Central journal article supplement — BMJ Open. 2019 Dec 16;9(12):e032551. doi: 10.1136/bmjopen-2019-032551 (PMC6936987; doi:10.1136/bmjopen-2019-032551), 2019-12-16
Supplement: bmjopen-2019-032551.draft_revisions.pdf [file bmjopen-2019-032551.draft_revisions.pdf]

# BMJ Open

BMJ Open is committed to open peer review. As part of this commitment we make the peer review history of every article we publish publicly available.

When an article is published we post the peer reviewers' comments and the authors' responses online. We also post the versions of the paper that were used during peer review. These are the versions that the peer review comments apply to.

The versions of the paper that follow are the versions that were submitted during the peer review process. They are not the versions of record or the final published versions. They should not be cited or distributed as the published version of this manuscript.

BMJ Open is an open access journal and the full, final, typeset and author-corrected version of record of the manuscript is available on our site with no access controls, subscription charges or pay-per-view fees (<http://bmjopen.bmj.com>).

If you have any questions on BMJ Open's open peer review process please email [info.bmjopen@bmj.com](mailto:info.bmjopen@bmj.com)

# BMJ Open

## Trends in antiepileptic drug treatment and effectiveness in clinical practice in England from 2003 to 2016

|                               |                                                                                                                                                                                                                                   |
|-------------------------------|-----------------------------------------------------------------------------------------------------------------------------------------------------------------------------------------------------------------------------------|
| Journal:                      | <i>BMJ Open</i>                                                                                                                                                                                                                   |
| Manuscript ID                 | bmjopen-2019-032551                                                                                                                                                                                                               |
| Article Type:                 | Research                                                                                                                                                                                                                          |
| Date Submitted by the Author: | 24-Jun-2019                                                                                                                                                                                                                       |
| Complete List of Authors:     | Powell, Graham; University of Liverpool, Department of Molecular and Clinical Pharmacology, Institute of Translational Medicine<br>Logan, John; Stats4Pharma<br>Kiri, Victor; FV & JK Consulting Ltd<br>Borghs, Simon; UCB Pharma |
| Keywords:                     | drug resistance, refractoriness, remission, Epilepsy < NEUROLOGY, seizure freedom, treatment patterns                                                                                                                             |
|                               |                                                                                                                                                                                                                                   |

SCHOLARONE™  
Manuscripts

1  
2  
3  
4 **Trends in antiepileptic drug treatment and effectiveness in clinical practice in**  
5 **England from 2003 to 2016**  
6  
7

8 Graham Powell,<sup>1</sup> John Logan,<sup>2</sup> Victor Kiri,<sup>3</sup> Simon Borghs<sup>4</sup>  
9

10  
11 <sup>1</sup> Department of Molecular and Clinical Pharmacology, Institute of Translational  
12 Medicine, University of Liverpool, Liverpool, Merseyside, UK  
13  
14

15  
16 <sup>2</sup> Stats4Pharma, Cork, Republic of Ireland  
17

18  
19 <sup>3</sup> FV & JK Consulting Ltd, Guildford, Surrey, UK  
20

21  
22 <sup>4</sup> UCB Pharma, Slough, Berkshire, UK  
23

24 Corresponding author: Simon Borghs, UCB Pharma, 208 Bath Road, Slough SL1  
25 3WE, UK; Simon.Borghs@ucb.com; Tel: +44 1753 44 7813  
26  
27

28  
29  
30  
31 Word count: 3332  
32

33  
34 Tables/Figures: 4 (Supplemental items: 2 tables, 2 figures)  
35

36  
37 References: 28  
38

39 **Keywords:** Drug resistance; refractoriness; remission; epilepsy; seizure freedom;  
40 treatment patterns  
41  
42  
43  
44  
45  
46  
47  
48  
49  
50  
51  
52  
53  
54  
55  
56  
57  
58  
59  
60

## ABSTRACT

**Objective** To assess the evolution of antiepileptic drug (AED) treatment patterns and seizure outcomes in England from 2003 to 2016.

**Design, setting and participants** Retrospective cohort study of electronic medical records from Clinical Practice Research Datalink and NHS Digital Hospital Episode Statistics databases. Patients newly diagnosed with epilepsy were identified and followed until end of data availability. Three eras were defined starting 1 April 2003 (first NICE guideline); 1 September 2007 (SANAD publication); 1 January 2012 (second NICE guideline).

**Outcome measures** Outcomes were time from diagnosis to first AED; AED sequence; time from first AED to first 1-year remission period (no new AED attempts and no seizure-related healthcare events); and time from first AED prescription to refractoriness (third AED attempt regardless of reason). Kaplan-Meier was used to analyse time-to-event variables.

**Results** 4388 patients were included. Mean follow-up was 6.8, 4.2, and 1.7 years by era. 84.6% of adults ( $\geq 16$  years), 75.5% of children ( $< 16$ ), and 89.1% of elderly (65+) received treatment within 1 year; rates were generally stable over time. Treatment trends included reduced use of carbamazepine (adult first-line, era 1: 34.9%; era 3: 10.7%) and phenytoin, earlier-line and increased use of levetiracetam (adult first-line, era 1: 2.6%; era 3: 26.2%) and lamotrigine, particularly in adults and elderly, and a larger number of different AEDs used overall. Valproate use shifted somewhat to later lines. Rates of 1-year remission within 2 years of starting treatment increased in adults (era 1: 71.9%; era 3: 81.4%) and elderly (era 1: 76.1%; era 3: 81.7%). Overall, 55.5% of patients relapsed after achieving 1-year remission. Refractoriness rates remained stable over the eras (~26% of adults within 5 years).

**Conclusion** Treatment trends often were not aligned with era-relevant guidance. However, our results suggest a slight improvement in epilepsy treatment outcomes over the 13-year period.

## ARTICLE SUMMARY

### Strengths and limitations of this study

- Use of the Clinical Practice Research Datalink and NHS Digital Hospital Episode Statistics databases allowed access to a large national pool of patients for identification of those newly diagnosed with epilepsy.
- Treatment eras were delineated by epilepsy guideline updates to allow capture of changes in antiepileptic drug treatment practice.
- The stringency of diagnostic criteria may limit the generalisability of the data.
- The nature of the data is prone to incomplete or incorrect medical records and coding, lack of specificity, and capture prescriptions but not prescription fills.
- The definition of remission was based on health care consultations, with 1 year possibly too short to be considered for remission; and drug resistance was based on switching antiepileptic drugs without taking into account the reasons for treatment changes, which were unknown but likely driven by lack of effect and poor tolerability.

## INTRODUCTION

The introduction of new antiepileptic drugs (AEDs) since 2003 has been accompanied by studies of the comparative efficacy, safety, and tolerability of older and newer AEDs,[1-3] as well as by evolving clinical practice guidelines that incorporate newer medications into recommendations for epilepsy treatment.[4-6] Treatment patterns would be expected to reflect the latest guidance for individual AEDs in epilepsy management, but scant information is available to assess alignment in clinical practice. A number of studies have reported an increase in the use of newer AEDs prescribed for first-line treatment in new-onset epilepsy in UK primary care settings[7, 8] and across European Union countries.[9]

Use of newer AEDs with reported similar or improved efficacy and better tolerability than older AEDs would be expected to benefit overall epilepsy treatment success and patient outcomes. However, literature suggests that there has been no meaningful improvement in epilepsy treatment-related outcomes[1, 10-12] and a notable portion of patients still fail first-line AED therapy.[13, 14] The objective of this study was to evaluate AED treatment patterns and seizure outcomes in England over three time periods from 2003 to 2016, using electronic medical record data, to provide further insights into the management of patients newly diagnosed with epilepsy.

## METHODS

### Study design

This was an exploratory, retrospective cohort analysis of primary care electronic medical records from the UK Clinical Practice Research Datalink (CPRD) and secondary care electronic medical records from the National Health Service (NHS) Digital Hospital Episode Statistics (HES) databases. The CPRD contained over 4 million active patient records (and more than 11 million overall) drawn from 674 UK primary care practices, representing approximately 7% of the UK population, in 2015

1  
2  
3  
4 [15]; these numbers have since grown.[16] The HES database contains details of all  
5 secondary care admissions, outpatient appointments, and Accident & Emergency  
6 attendances at NHS hospitals in England.[17]  
7  
8  
9

10 AED treatment patterns and seizure outcomes in England were assessed  
11 over three 4.5-year eras. Era 1 (first guideline era) included dates from 1 April 2003  
12 to 31 August 2007 and encompassed the publication of the first National Institute for  
13 Health and Care Excellence (NICE) epilepsy guidance.[4, 18, 19] These guidelines  
14 recommended carbamazepine (CBZ) or sodium valproate (VPA) as first-line  
15 treatment for focal (partial-onset) and generalised seizures. Era 2 (intermediate era)  
16 was defined as 1 September 2007 to 31 December 2011, and captured updated  
17 guidance that recommended lamotrigine (LTG) or CBZ as first line for focal (partial-  
18 onset) seizures and VPA for generalised seizures based on a large randomized  
19 pragmatic trial (SANAD).[1] Era 3 (newer guideline era) spanned the timeframe from  
20 1 January 2012 to 31 May 2016, with the second NICE epilepsy guidance  
21 recommending CBZ or LTG as first-line treatment for focal seizures, VPA for  
22 generalised seizures, and advice to be given to women of childbearing potential  
23 regarding foetal risks of malformation and neurodevelopmental impairments with  
24 VPA.[6, 20] A 2015 update warned against prescribing VPA to pregnant women and  
25 those of childbearing potential unless other AEDs were ineffective or not tolerated (in  
26 2018 guidelines, VPA is contraindicated in girls and women of childbearing  
27 potential).[21]  
28  
29  
30  
31  
32  
33  
34  
35  
36  
37  
38  
39  
40  
41  
42  
43  
44

### 45 **Cohort selection**

46  
47 Patients with epilepsy newly diagnosed between 1 April 2003 and 31 May 2016 (date  
48 of last available CPRD practice data) were included in the study. Diagnosis was  
49 operationalised as an incident epilepsy diagnosis code (online supplementary table  
50 S1) at or near a neurologist visit, as assessed in HES outpatient data or primary care  
51 referral data using June 2016 data sets, and constituted the index date. Those who  
52 had started an AED attempt less than 3 months prior to a diagnosis were included.  
53 An AED attempt was defined on the start date of an AED prescription that a patient  
54 had never used before, and maintained for at least 31 days, as identified in primary  
55  
56  
57  
58  
59  
60

1  
2  
3  
4 care records. A pre-index period of at least 2 years was required with their practice's  
5 data flagged as up-to-standard. Patients were excluded if they had an epilepsy  
6 diagnosis at any time before the index date, or AED treatment during the 2-year pre-  
7 index period. Included patients were followed until data were no longer available,  
8 owing either to death or to leaving their general practitioner practice or date of last  
9 CPRD data (31 May 2016).  
10  
11  
12  
13  
14

15 Three age cohorts were considered: adults aged  $\geq 16$  years, children  $\geq 2$  to  
16  $< 16$  years of age, and the elderly,  $\geq 65$  years of age (a subset of adult patients).  
17  
18  
19  
20  
21

## 22 **Outcome measures**

23  
24  
25 The primary outcome was time to 1-year remission from seizures for all treated  
26 patients, starting from the time of first AED attempt until first 1-year period of  
27 remission. One-year remission was defined as having no new AED attempts, and the  
28 absence of all seizure-related healthcare events and quality outcomes framework  
29 data and read codes indicating a seizure at any time for at least 1 year (online  
30 supplementary table S2). A subsequent occurrence of any of these events is defined  
31 as a relapse. Outcomes also included time from diagnosis to first AED prescription  
32 (all patients); treatment patterns by era, age, and sex cohort; and time from first AED  
33 prescription to refractoriness (treated patients only), which was defined as a third  
34 distinct AED attempt as identified in primary care records. The end of AED exposure  
35 and treatment as poly/monotherapy were not assessed.  
36  
37  
38  
39  
40  
41  
42  
43  
44  
45  
46  
47

## 48 **Statistical analysis**

49  
50 Descriptive statistics were used to summarise both continuous variables and  
51 categorical variables such as mean, standard deviation (SD), median, and  
52 percentages. Analyses were conducted on unmatched cohorts and reported results  
53 are unadjusted. Outcomes were evaluated using Kaplan-Meier analysis.  
54  
55  
56  
57  
58  
59  
60



The protocol for this study was reviewed and approved by the Independent Scientific Advisory Committee, the CPRD scientific/ethics committee.

## Patient involvement statement

This research was conducted without patient involvement in the design or interpretation of this study, or in the writing and editing of this document.

## RESULTS

### Study participants

Overall, of 137,267 patients with an epilepsy diagnosis code in the data, 4388 patients (adults n=3861; children n=527) met the study inclusion criteria and were available for analysis. Mean follow-up was 6.8 years (era 1), 4.2 years (era 2), and 1.7 years (era 3). Baseline characteristics were largely as expected for diagnosed patients (overall population: mean age at diagnosis, 41.4 years; 85.0% of patients with  $\geq 1$  AED treatment; 78.4% with unspecified epilepsy) (table 1). There appeared to be higher rates of comorbidities, reflected by epilepsy-specific comorbidity index scores, and lower rates of unspecified epilepsy diagnosis in era 3 compared with era 1. There were minor changes in the regional make-up of CPRD data, with the number of practices participating in CPRD generally decreasing in eastern regions and increasing in London and southern regions over time (eg, London made up 13.7% of practices in 2005 and 19.0% in 2015).

**Table 1** Baseline characteristics of the sample population.

|  | Adults             | Children    | Elderly*           |
|--|--------------------|-------------|--------------------|
|  | ( $\geq 16$ years) | (<16 years) | ( $\geq 65$ years) |
|  | n=3861             | n=527       | n=876              |

|                                                               |             |            |            |
|---------------------------------------------------------------|-------------|------------|------------|
| Age at diagnosis, years, mean (SD)                            | 45.9 (20.4) | 8.5 (4.0)  | 74.7 (7.0) |
| Female, n (%)                                                 | 1845 (47.8) | 244 (46.3) | 372 (42.5) |
| No. diagnosed (%)                                             |             |            |            |
| Era 1, n (% of era)                                           | 1276 (33.0) | 133 (25.2) | 260 (29.7) |
| Era 2, n (% of era)                                           | 1452 (37.6) | 248 (47.1) | 322 (36.8) |
| Era 3, n (% of era)                                           | 1133 (29.3) | 146 (27.7) | 294 (33.6) |
| Germaine-Smith epilepsy-specific comorbidity index, mean (SD) | 0.8 (1.9)   | 0.3 (1.0)  | 2.1 (2.5)  |
| Era 1, n (% of era)                                           | 0.6 (1.5)   | 0.3 (1.0)  | 1.4 (2.3)  |
| Era 2, n (% of era)                                           | 0.8 (1.8)   | 0.2 (0.7)  | 2.0 (2.3)  |
| Era 3, n (% of era)                                           | 1.1 (2.4)   | 0.4 (1.2)  | 2.7 (2.9)  |
| Epilepsy type                                                 |             |            |            |
| Generalised, n (%)                                            | 324 (8.4)   | 72 (13.7)  | 65 (7.4)   |
| Era 1, n (% of era)                                           | 91 (7.1)    | 15 (11.3)  | 15 (5.8)   |
| Era 2, n (% of era)                                           | 119 (8.2)   | 44 (17.7)  | 22 (6.8)   |
| Era 3, n (% of era)                                           | 114 (10.1)  | 13 (8.9)   | 28 (9.5)   |
| Focal (partial-onset), n (%)                                  | 475 (12.3)  | 76 (14.4)  | 114 (13.0) |
| Era 1, n (% of era)                                           | 162 (12.7)  | 15 (11.3)  | 46 (17.7)  |
| Era 2, n (% of era)                                           | 153 (10.5)  | 31 (12.5)  | 29 (9.0)   |
| Era 3, n (% of era)                                           | 160 (14.1)  | 30 (20.5)  | 39 (13.3)  |
| Unspecified                                                   | 3062 (79.3) | 379 (71.9) | 697 (79.6) |
| Era 1, n (% of era)                                           | 1023 (80.2) | 103 (77.4) | 199 (76.5) |

|                                             |             |            |            |
|---------------------------------------------|-------------|------------|------------|
| Era 2, n (% of era)                         | 1180 (81.3) | 173 (69.8) | 271 (84.2) |
| Era 3, n (% of era)                         | 859 (75.8)  | 103 (70.5) | 227 (77.2) |
| At least one AED treatment, n (%)           | 3313 (85.8) | 417 (79.1) | 783 (89.4) |
| Total follow-up, patient-years <sup>†</sup> | 16,483.92   | 2363.94    | 3257.28    |
| Mean follow-up, years                       | 4.3         | 4.5        | 3.7        |
| Era 1, n (% of era)                         | 6.7         | 7.3        | 6.0        |
| Era 2, n (% of era)                         | 4.1         | 4.6        | 3.7        |
| Era 3, n (% of era)                         | 1.7         | 1.8        | 1.7        |

Era 1, 1 April 2003 to 31 August 2007 (first NICE guidance); era 2, 1 September 2007 to 31 December 2011 (SANAD); era 3, 1 January 2012 to study 31 May 2016 (second NICE guidance).

\*Elderly patients are a subset of the adult patient population.

<sup>†</sup>Total follow-up, patient-years: calculated by adding the follow-up time for all patients.

AED, antiepileptic drug.

Many patients (n=4456) who met inclusion criteria were excluded owing to pre-diagnosis AED use, primarily with AEDs that have multiple indications (eg, valproate, carbamazepine, lamotrigine). Because of the required 2-year baseline period, no 0- or 1-year-old children were included in the sample.

### Time from diagnosis to first AED prescription

Kaplan-Meier estimates revealed that 84.6% of adults, 75.5% of children, and 89.1% of the elderly received AED treatment within 1 year of index date (figure 1).

Treatment rates from era 1 to era 3 appeared to increase slightly in adults (82.3% to 86.6%) and the elderly (86.3% to 90.8%), and to decrease slightly in children (77.4% to 69.2%).

## Treatment patterns over time

Analysis of treatment patterns over time in adults shows a large shift away from CBZ (adult first-line share, era 1: 34.9%; era 3: 10.7%) and phenytoin (PHT; adult first-line share, era 1: 7.6%; era 3: 2.1%), and toward earlier and increased use of levetiracetam (LEV; adult first-line share, era 1: 2.6%; era 3: 26.2%) (figure 2A). The use of first-line VPA remained relatively stable over eras 1 and 2, and decreased in era 3. AED treatment patterns appeared to be far more stable in children than adults, with use of first-line VPA remaining high over time (first-line share: in children, era 1: 49.0%; era 3: 49.6%; in adults, era 1: 29.0%; era 3, 49.0%; figure 2B). Nevertheless, the use of CBZ decreased in favour of earlier use of LEV (CBZ first-line share, era 1: 30.8%; era 3: 15.4%; LEV first-line share, era 1: 0%; era 3: 15.4%). These AED patterns were consistent for second-line treatment in children. Treatment pattern changes in the elderly population were similar but more pronounced than in the overall adult patient population. In the elderly, CBZ use fell in all treatment lines (first-line share, era 1: 36.3%; era 3: 9.1%; second-line share, era 1: 23.9%; era 3: 5.7%; third-line share, era 1: 16.7%; era 3: 4.7%) in favour of earlier and increased use of lamotrigine (LTG) and LEV (LTG first-line share, era 1: 8.5%; era 3: 27.4%; LEV first-line share, era 1: 4.0%; era 3: 31.2%; figure 2C).

Analysis of treatment patterns by sex indicated that in adults, women were prescribed first-line VPA and CBZ less often and LTG more often than men—a finding that remained stable over time (women vs men, era 1: VPA, 22.7% vs 35.2%; CBZ, 30.7% vs 39.2%, LTG, 31.4% vs 11.9%; era 3: VPA, 11.8% vs 26.1%; CBZ, 8.4% vs 12.8%; LTG, 42.6% vs 26.7%; figure 3). The trends in VPA and LTG use were mostly intact through third-line AED (figure 3). In children, generally LEV and LTG were more common and VPA less common for girls than boys across eras as well as through second-line AED (supplemental figure 1). In the elderly subgroup, first-line treatment patterns were comparable between men and women (supplemental figure 2).

## One-year remission rates

One-year remission rates, within 1 or 2 years of treatment initiation, increased somewhat over time in adults and the elderly, but were more variable in children (table 2). The percentage of patients achieving a 1-year period of remission within 1 year of starting treatment increased from era 1 to era 3 in all three age cohorts. The most substantial increase (era 1 to era 3) was observed in the elderly (31.5% to 47.3%; a 50.3% increase from era 1). The percentage of adults and the elderly achieving 1-year remission within 2 years of starting treatment was higher than within 1 year and increased over time (era 1 to era 3: 71.9% to 81.4% adults; 76.1% to 81.7% elderly). In children, there was a slight decrease in remission rates within 2 years of treatment from era 1 to era 3 (table 2). Overall, 55.5% of patients relapsed after achieving 1-year remission.

**Table 2** Treatment outcomes by study population and era

|                                                                      | <b>Adults<br/>(≥16 years)<br/>n=3313</b> | <b>Children<br/>(&lt;16 years)<br/>n=417</b> | <b>Elderly<br/>(≥65 years)<br/>n=783</b> |
|----------------------------------------------------------------------|------------------------------------------|----------------------------------------------|------------------------------------------|
| <b>Rate of 1-year remission within 1 or 2 years of treatment</b>     |                                          |                                              |                                          |
| Patients with at least one period of 1-year remission,* n (%)        | 2430 (73.3)                              | 317 (76.0)                                   | 536 (68.5)                               |
| Of these patients, at least one relapse,* n (%)                      | 1362 (56.0)                              | 163 (51.4)                                   | 310 (57.8)                               |
| 1-year period of remission 1 year from treatment start (KM estimate) | 35.2%                                    | 40.1%                                        | 36.3%                                    |
| Era 1 <sup>†</sup>                                                   | 31.6%                                    | 36.4%                                        | 31.5%                                    |
| Era 2 <sup>†</sup>                                                   | 34.7%                                    | 41.9%                                        | 32.8%                                    |
| Era 3 <sup>†</sup>                                                   | 42.0%                                    | 40.8%                                        | 47.3%                                    |

|                                                                              |       |        |       |
|------------------------------------------------------------------------------|-------|--------|-------|
| 1-year period of remission within 2 years of treatment start (KM estimate)   | 75.3% | 75.9%  | 78.4% |
| Era 1 <sup>†</sup>                                                           | 71.9% | 73.0%  | 76.1% |
| Era 2 <sup>†</sup>                                                           | 75.3% | 78.3%  | 78.2% |
| Era 3 <sup>†</sup>                                                           | 81.4% | 72.8%  | 81.7% |
| <b>Rate of refractoriness within 3 years of starting first AED treatment</b> |       |        |       |
| Patients refractory 3 years from start of treatment (KM estimate)            | 17.5% | 23.8%  | 11.9% |
| Era 1 <sup>†</sup>                                                           | 17.3% | 20.8%  | 11.1% |
| Era 2 <sup>†</sup>                                                           | 17.4% | 24.3%  | 13.4% |
| Era 3 <sup>†</sup>                                                           | 17.6% | (n<10) | 11.2% |

Era 1, 1 April 2003 to 31 August 2007 (first NICE guidance); era 2, 1 September 2007 to 31 December 2011 (SANAD); era 3, 1 January 2012 to study 31 May 2016 (second NICE guidance).

\*Raw figures, not adjusted for differential follow-up between eras.

<sup>†</sup>Number of patients diagnosed in era 1, 2, and 3, respectively, and received treatment: adults, n=1097, 1254, and 962; children, n=110, 204, and 103; elderly, n=234, 291, and 258.

AED, antiepileptic drug; KM, Kaplan-Meier estimate.

### Time from first AED treatment to refractoriness

Overall, a similar percentage (about 17% to 18%) of adult patients became refractory within 3 years of first starting treatment across the different eras (table 2).

Approximately 25% to 26% of adults were treatment refractory after 5 years (data not shown). Elderly patients were less likely to become treatment refractory than all adults or children (table 2).

## DISCUSSION

The results of this analysis suggest that there has been some improvement in epilepsy outcomes, reflected by shorter times to 1-year remission (no new AED attempts or seizure-related healthcare events for at least 1 year) over the 13-year period. Various reasons may contribute to this observation, including improved diagnosis of epilepsy and differential diagnosis of non-epilepsy disorders, more active epilepsy management with personalised treatment, and wider use of newer, better-tolerated AEDs, particularly to replace enzyme-inducing drugs in the elderly population who are most susceptible to risks associated with enzyme induction.[22] Although our study assessed treatment patterns by age group and sex, it did not assess whether prescribing is targeted based upon other patient characteristics.

The observed major changes in prescription trends are at odds with NICE guidelines during era 3, which suggest prescribing CBZ or LTG as first-line treatment in children and adults with newly diagnosed focal seizures, and VPA for those newly diagnosed with generalised seizures.[6] Analysis of first-line treatment patterns over time shows a reduction in VPA use in era 3, a large shift away from CBZ and PHT in all treatment lines, and a trend toward earlier and increased usage of LEV in adults, particularly the elderly.[6] Although the sharp decrease in PHT aligns with 2012 NICE guidelines,[6] possibly reflecting a change in AEDs used in acute settings or a shift to non-enzyme active AEDs (nEAAEDs) in older patients, the decrease in CBZ and increase in LEV do not align with treatment guidelines.

For elderly patients, 2012 NICE guidelines recommend CBZ as an extended release formulation.[6] Preferential use of CBZ in older patients was reported in a study of CPRD data from 2001 to 2010, which found that patients receiving enzyme-inducing AEDs (EIAEDs: CBZ, 63.3%; PHT, 35.3%) were older and had more comorbid illness; the study also reported the use of EIAEDs resulted in higher healthcare costs compared with nEAAEDs.[22] Our findings also show that CBZ was most often prescribed for the elderly population during era 1 (2003-2007). Given the higher susceptibility to risks associated with enzyme induction, as well as increased costs, a shift to nEAAEDs would appear a rational change that is reflected in era 3 prescribing trends.

1  
2  
3  
4 In children, treatment patterns were more stable, which may reflect the  
5 situation that fewer new AEDs have become available for this population. Limited  
6 choices may be related to the more stringent criteria necessary for drug approval,  
7 with more complex trial designs and challenges in recruitment. The stability of VPA  
8 use in children may be related to its broad spectrum activity when diagnosis is  
9 uncertain.  
10  
11  
12  
13  
14

15 In women, use of VPA greatly diminished across eras, lending support to a  
16 database study in the US that reported decreased VPA use among adult women.[23]  
17 These findings are perhaps not surprising given the teratogenic profile of VPA and  
18 increased warnings associated with VPA in girls and women of childbearing  
19 potential. In 2018, the Medicines and Healthcare products Regulatory Agency  
20 advised against the use of VPA in girls and women of childbearing potential;[24]  
21 thus, one might anticipate further declines in its use going forward.  
22  
23  
24  
25  
26  
27

28 A longitudinal cohort study describing seizure freedom rates over 30 years  
29 reported a virtually unchanged seizure-freedom rate, and a decrease in the  
30 probability of achieving seizure freedom with each unsuccessful AED regimen  
31 prescribed.[11] The study reported 61% to 64% of patients achieved 1-year seizure  
32 freedom over time.[11] Study authors concluded that despite changing treatment  
33 patterns and greater use of newer AEDs, as observed in the present study, no  
34 meaningful improvements in long-term outcomes had occurred. In contrast, our  
35 study found an improvement in outcomes, with a higher proportion of patients  
36 entering remission, nearly half of whom subsequently relapsed. Across eras, an  
37 increasing proportion of patients achieved 1-year remission (eg, 71.9% to 81.4% for  
38 adult subgroup). There are a number of differences that may explain the discrepancy  
39 in results between these studies. First, the prior study assessed 1-year seizure  
40 freedom before study end (thus excluding those who were seizure-free for  $\geq 12$   
41 months who relapsed before study end), whereas our study assessed 1-year  
42 remission from AED initiation. Because patients with longer follow-up also have more  
43 time and opportunity to relapse, in the prior study 1-year seizure freedom favours  
44 patients with shorter follow-up (ie, those diagnosed in later eras), which is not the  
45 case in the current study. By using Kaplan-Meier methods to adjust for this  
46 differential follow-up time between eras, we found increasing remission rates over  
47  
48  
49  
50  
51  
52  
53  
54  
55  
56  
57  
58  
59  
60



1  
2  
3  
4 time in adult and elderly subgroups. Other notable differences include time periods of  
5 the study cohorts (1982–2012 vs 2003–2012), available AEDs, reported study  
6 population (overall vs age-specific subgroups), settings (single epilepsy centre in  
7 Glasgow vs general practitioner practices across England), and data source (medical  
8 records and notes vs structured electronic medical records). It is possible that  
9 reporting outcomes for an overall population may have masked trends in the adult  
10 population, as our study found treatment patterns and remission rates in children  
11 were relatively stable over time periods.  
12  
13  
14  
15  
16  
17  
18

19 The proportion of patients who were refractory within 3 years of first starting  
20 AED treatment was similar across eras, although percentages varied somewhat  
21 according to age group. The trend for increasing remission rates and stable  
22 refractoriness rates would appear to be a contradiction. A possible explanation may  
23 be that patients progress through 3 AEDs treatments via more active management.  
24 Although these patients would meet the definition for refractory epilepsy, the AEDs  
25 may represent more specifically chosen, better tolerated treatments that lead to  
26 improved remission rates.  
27  
28  
29  
30  
31  
32  
33

34 Study interpretation is limited by a number of factors. The conservative,  
35 stringent diagnostic criteria may have limited the generalisability of the data, as the  
36 study selection rate was approximately 25% to 30% of the expected incidence  
37 rate.[25] The accuracy of electronic medical records data is limiting, as instances  
38 whereby a seizure or epilepsy code was used after a non-seizure event could be  
39 present. The requirement for a neurologist visit as part of our epilepsy diagnosis  
40 criteria was intended to maximise the accuracy of the diagnosis. Additionally, the  
41 epilepsy type was not usually discernible from medical record recording practices in  
42 our study, with 70% to 80% of patients having been classified as having an  
43 unspecified epilepsy diagnosis. Because patient characteristics by AED were not  
44 assessed, the accuracy of selected AED(s) is not known (all prescriptions reflect  
45 data from general practitioners).  
46  
47  
48  
49  
50  
51  
52  
53  
54

55 Outcome definitions may also contribute to limitations. Our definition of  
56 remission was based on healthcare consultations, and it could be argued that the 1-  
57 year time period was insufficient to be considered as 'remission',[26] or that basing  
58  
59  
60

1  
2  
3  
4 remission on healthcare encounters rather than information about seizure frequency  
5 may be unspecific. Further, the definition of seizure freedom has evolved, with the  
6 ILAE proposing a 'rule of three', including the absence of seizures for at least the  
7 previous 12 months OR for three times the longest pre-treatment interval between  
8 seizures, whichever is greater.[27] In our study, drug resistance (refractoriness) was  
9 based on switching AEDs and did not take into account the reasons for treatment  
10 changes, which were unknown (eg, adverse events/tolerability, pregnancy) but likely  
11 were predominantly driven by a combination of lack of efficacy and poor tolerability.  
12 This definition differs from that proposed by the ILAE in 2010: 'Drug resistant  
13 epilepsy may be defined as failure of adequate trials of two tolerated and  
14 appropriately chosen and used AED schedules (whether as monotherapies or in  
15 combination) to achieve sustained seizure freedom.'[27]

16  
17  
18  
19  
20  
21  
22  
23  
24  
25  
26 Our study is also limited by incomplete information regarding prescribing data  
27 from general practitioners, particularly lack of information regarding patient  
28 adherence and the appropriateness of AED selection based on patient  
29 characteristics. Shifts in the make-up of practices supplying data to CPRD (eg,  
30 reflected by capture of higher rates of comorbidities and specified epilepsy  
31 diagnosis, and shifts in the regional make up of CPRD data, which may be  
32 associated with regional treatment practices) over time may have introduced  
33 unmeasured bias in patient baseline characteristics. Changes to data availability and  
34 accuracy over eras may have affected results, with a prior study noting the improved  
35 accuracy of administrative or registry data in later years.[28] A crucial limitation is  
36 that cohorts are unmatched and analyses unadjusted; thus, there is no statistical  
37 basis for comparisons between outcomes. As such, our findings are exploratory in  
38 nature and should be interpreted with caution.

39  
40  
41  
42  
43  
44  
45  
46  
47  
48  
49 Despite these potential limitations, our study suggests an evolution of AED  
50 treatment patterns and AED effectiveness over a 15-year period in clinical practice in  
51 England. Major changes in treatment patterns, particularly a reduction in CBZ and  
52 PHT use in favour of earlier and increased use of LEV, were observed. Although our  
53 study did not assess the use of particular AEDs based on patient characteristics or  
54 appropriateness, we generally found a reduction in the use of EIAEDs in the elderly  
55 and VPA in women, in keeping with newer treatment recommendations. In contrast  
56  
57  
58  
59  
60

1  
2  
3  
4 to other studies reporting no meaningful improvement in the overall epilepsy  
5 population,[10, 11] we found an increase in 1-year remission rates following AED  
6 initiation in adults, which, given the limitations of the current study, will need to be  
7 further studied. Although some improvement in epilepsy treatment outcomes was  
8 observed, a sizable proportion of patients with epilepsy remain uncontrolled on first-  
9 and second-line treatment, indicating a continued need for innovations for patients  
10 living with poorly controlled epilepsy.  
11  
12  
13  
14  
15  
16  
17  
18  
19

## 20 **ACKNOWLEDGMENTS**

21  
22 This study is based in part on data from the General Practice Research Database  
23 obtained under license from the UK Medicines and Healthcare products Regulatory  
24 Agency. However, the interpretation and conclusions contained in this report are  
25 those of the authors alone. The authors acknowledge Cheryl Hudson (UCB Pharma,  
26 Slough UK) for publication coordination, and Lynne Isbell, PhD, CMPP and Richard  
27 Fay, PhD, CMPP (Evidence Scientific Solutions, Philadelphia, PA, USA) for writing  
28 assistance, which was funded by UCB Pharma.  
29  
30  
31  
32  
33  
34

35 **Contributors** GP and SB conceived of the study and had a role in study design. JL  
36 and VK conducted data collection, extraction, and analysis of the data. GP, SB, and  
37 JL contributed to data interpretation. All authors contributed to the review and  
38 revision of the manuscript and approved of the final manuscript for publication.  
39  
40  
41  
42

43 **Funding** This work was supported by UCB Pharma.  
44  
45

46 **Competing interests** G Powell is a paid medical consultant for UCB Pharma. J  
47 Logan and V Kiri are paid consultants for UCB Pharma. S Borghs is an employee of  
48 UCB Pharma.  
49  
50

51 **Patient consent for publication** Not required.  
52  
53

54 **Data sharing statement** The CPRD and HES datasets used in this study are  
55 available from the National Institute for Health Research, the Medicines & Healthcare  
56 products Regulatory Agency, and NHS Digital, respectively.  
57  
58  
59  
60

## REFERENCES

- 1 Marson AG, Al-Kharusi AM, Alwaidh M, et al. The SANAD study of effectiveness of carbamazepine, gabapentin, lamotrigine, oxcarbazepine, or topiramate for treatment of partial epilepsy: an unblinded randomised controlled trial. *Lancet* 2007;369:1000–15. doi: 10.1016/S0140-6736(07)60460-7 [published Online First: 27 March 2007]
- 2 Brodie MJ, Mintzer S, Pack AM, et al. Enzyme induction with antiepileptic drugs: cause for concern? *Epilepsia* 2013;54:11–27. doi: 10.1111/j.1528-1167.2012.03671.x [published Online First: 29 September 2012]
- 3 Johannessen Landmark C, Patsalos PN. Drug interactions involving the new second- and third-generation antiepileptic drugs. *Expert Rev Neurother* 2010;10:119–40. doi: 10.1586/ern.09.136 [published Online First: 22 December 2009]
- 4 Stokes T, Shaw EJ, Juarez-Garcia A, et al. The diagnosis and management of the epilepsies in adults and children in primary and secondary care. London: Royal College of General Practitioners, 2004.
- 5 Glauser T, Ben-Menachem E, Bourgeois B, et al. Updated ILAE evidence review of antiepileptic drug efficacy and effectiveness as initial monotherapy for epileptic seizures and syndromes. *Epilepsia* 2013;54:551–63. doi: 10.1111/epi.12074 [published Online First: 29 January 2013]
- 6 National Institute for Health and Care Excellence. Epilepsies: diagnosis and management, CG137. 2012. <https://www.nice.org.uk/guidance/cg137> (accessed 15 January 2019).
- 7 Pickrell WO, Lacey AS, Thomas RH, et al. Trends in the first antiepileptic drug prescribed for epilepsy between 2000 and 2010. *Seizure* 2014;23:77–80. doi: 10.1016/j.seizure.2013.09.007 [published Online First: 15 October 2013]
- 8 Nicholas JM, Ridsdale L, Richardson MP, et al. Trends in antiepileptic drug utilisation in UK primary care 1993–2008: cohort study using the General Practice Research Database. *Seizure* 2012;21:466–70. doi: 10.1016/j.seizure.2012.04.014 [published Online First: 23 May 2012]
- 9 de Groot MC, Schuerch M, de Vries F, et al. Antiepileptic drug use in seven electronic health record databases in Europe: a methodologic comparison. *Epilepsia* 2014;55:666–73. doi: 10.1111/epi.12557 [published Online First: 27 February 2014]

- 1  
2  
3  
4 10 Löscher W, Schmidt D. Modern antiepileptic drug development has failed to  
5 deliver: ways out of the current dilemma. *Epilepsia* 2011;52:657–78. doi:  
6 10.1111/j.1528-1167.2011.03024.x [published Online First: 22 March 2011]  
7  
8 11 Chen Z, Brodie MJ, Liew D, et al. Treatment outcomes in patients with newly  
9 diagnosed epilepsy treated with established and new antiepileptic drugs: a 30-year  
10 longitudinal cohort study. *JAMA Neurol* 2018;75:279–86. doi:  
11 10.1001/jamaneurol.2017.3949 [published Online First: 16 December 2017]  
12  
13 12 Kwan P, Brodie MJ. Clinical trials of antiepileptic medications in newly diagnosed  
14 patients with epilepsy. *Neurology* 2003;60 (11 Suppl 4):S2–12. doi:  
15 10.1212/wnl.60.11\_suppl\_4.s2 [published Online First: 10 June 2003]  
16  
17 13 Karlsson L, Wettermark B, Tomson T. Drug treatment in patients with newly  
18 diagnosed unprovoked seizures/epilepsy. *Epilepsy Res* 2014;108:902–8. doi:  
19 10.1016/j.epilepsyres.2014.03.004 [published Online First: 27 March 2014]  
20  
21 14 Bonnett LJ, Tudur Smith C, Donegan S, et al. Treatment outcome after failure of  
22 a first antiepileptic drug. *Neurology* 2014;83:552–60. doi:  
23 10.1212/WNL.0000000000000673 [published Online First: 3 July 2014]  
24  
25 15 Herrett E, Gallagher AM, Bhaskaran K, et al. Data resource profile: Clinical  
26 Practice Research Datalink (CPRD). *Int J Epidemiol* 2015;44:827–36. doi:  
27 10.1093/ije/dyv098 [published Online First: 6 June 2015]  
28  
29 16 Clinical Practice Research Datalink. Data. 2019. <https://cprd.com/Data> (accessed 9  
30 April 2019).  
31  
32 17 NHS Digital. Hospital Episode Statistics (HES). 2019. [https://digital.nhs.uk/data-](https://digital.nhs.uk/data-and-information/data-tools-and-services/data-services/hospital-episode-statistics)  
33 [and-information/data-tools-and-services/data-services/hospital-episode-statistics](https://digital.nhs.uk/data-and-information/data-tools-and-services/data-services/hospital-episode-statistics)  
34 (accessed 9 April 2019).  
35  
36 18 National Institute for Health and Care Excellence. The Epilepsies: The diagnosis  
37 and management of the epilepsies in adults and children in primary and secondary  
38 care, CG20. 2004. <https://www.nice.org.uk/guidance/cg20> (accessed Jan 15, 2019).  
39  
40 19 Perucca E. NICE guidance on newer drugs for epilepsy in adults. *BMJ*  
41 2004;328:1273–4. doi: 10.1136/bmj.328.7451.1273 [published Online First: 27 May  
42 2004]  
43  
44 20 Nunes VD, Sawyer L, Neilson J, et al. Diagnosis and management of the  
45 epilepsies in adults and children: summary of updated NICE guidance. *BMJ*  
46 2012;344:e281. doi: 10.1136/bmj.e281 [published Online First: 2012/01/28]  
47  
48  
49  
50  
51  
52  
53  
54  
55  
56  
57  
58  
59  
60

1  
2  
3  
4 21 Medicines and Healthcare products Regulatory Agency. Medicines related to  
5 valproate: risk of abnormal pregnancy outcomes. 2015. [https://www.gov.uk/drug-](https://www.gov.uk/drug-safety-update/medicines-related-to-valproate-risk-of-abnormal-pregnancy-outcomes)  
6 [safety-update/medicines-related-to-valproate-risk-of-abnormal-pregnancy-outcomes](https://www.gov.uk/drug-safety-update/medicines-related-to-valproate-risk-of-abnormal-pregnancy-outcomes)  
7 (accessed 6 February 2019).  
8

9  
10 22 Borghs S, Thieffry S, Noack-Rink M, et al. Health care cost associated with the  
11 use of enzyme-inducing and non-enzyme-active antiepileptic drugs in the UK: a long-  
12 term retrospective matched cohort study. *BMC Neurol* 2017;17:59. doi:  
13 10.1186/s12883-017-0837-y [published Online First: 23 March 2017]  
14

15  
16 23 Thurman D, Faught E, Kim H, et al. Antiepileptic drug treatment patterns in  
17 women of childbearing age with epilepsy: a US database analysis [abstract].  
18 American Epilepsy Society 71st Annual Meeting; 1–5 December 2017; Washington  
19 DC.  
20

21 [https://www.aesnet.org/meetings\\_events/annual\\_meeting\\_abstracts/view/342678](https://www.aesnet.org/meetings_events/annual_meeting_abstracts/view/342678)  
22

23  
24 24 Medicines and Healthcare products Regulatory Agency. Valproate medicines  
25 (Epilim, Depakote): contraindicated in women and girls of childbearing potential  
26 unless conditions of Pregnancy Prevention Programme are met,. 2018.  
27

28 [https://www.gov.uk/drug-safety-update/valproate-medicines-epilim-depakote-](https://www.gov.uk/drug-safety-update/valproate-medicines-epilim-depakote-contraindicated-in-women-and-girls-of-childbearing-potential-unless-conditions-of-pregnancy-prevention-programme-are-met)  
29 [contraindicated-in-women-and-girls-of-childbearing-potential-unless-conditions-of-](https://www.gov.uk/drug-safety-update/valproate-medicines-epilim-depakote-contraindicated-in-women-and-girls-of-childbearing-potential-unless-conditions-of-pregnancy-prevention-programme-are-met)  
30 [pregnancy-prevention-programme-are-met](https://www.gov.uk/drug-safety-update/valproate-medicines-epilim-depakote-contraindicated-in-women-and-girls-of-childbearing-potential-unless-conditions-of-pregnancy-prevention-programme-are-met) (accessed 13 February 2019).  
31

32  
33 25 Joint Epilepsy Council of the UK and Ireland. Epilepsy prevalence, incidence and  
34 other statistics. 2011.  
35

36 [http://www.epilepsyscotland.org.uk/pdf/Joint\\_Epilepsy\\_Council\\_Prevalence\\_and\\_Inci-](http://www.epilepsyscotland.org.uk/pdf/Joint_Epilepsy_Council_Prevalence_and_Incidence_September_11_(3).pdf)  
37 [dence\\_September\\_11\\_\(3\).pdf](http://www.epilepsyscotland.org.uk/pdf/Joint_Epilepsy_Council_Prevalence_and_Incidence_September_11_(3).pdf) (accessed 15 January 2019).  
38

39  
40 26 Sillanpää M, Schmidt D, Saarinen MM, et al. Remission in epilepsy: how long is  
41 enough? *Epilepsia* 2017;58:901–06. doi: 10.1111/epi.13732 [published Online First:  
42 04 April 2017]  
43

44  
45 27 Kwan P, Arzimanoglou A, Berg AT, et al. Definition of drug resistant epilepsy:  
46 consensus proposal by the ad hoc Task Force of the ILAE Commission on  
47 Therapeutic Strategies. *Epilepsia* 2010;51:1069–77. doi: 10.1111/j.1528-  
48 1167.2009.02397.x [published Online First: 3 November 2009]  
49

50  
51 28 Burns EM, Rigby E, Mamidanna R, et al. Systematic review of discharge coding  
52 accuracy. *J Public Health (Oxf)* 2012;34:138–48. doi: 10.1093/pubmed/fdr054  
53 [published Online First: 2011/07/29]  
54  
55  
56  
57  
58  
59  
60

## FIGURE LEGENDS

**Figure 1** Time from first diagnosis to first AED prescription in A) adults (n=3861), B) children (n=527), and C) elderly (n=876).

AED, antiepileptic drug.

**Figure 2** Treatment patterns by AED attempt in A) adults, B) children, and C) elderly.\*

\*AEDs accounting for  $\geq 1\%$  of attempts in any patient group in any era.

ACZ, acetazolamide; AED, antiepileptic drug; CBZ, carbamazepine; CLB, clobazam; CLO, clonazepam; ESL, eslicarbazepine; GBP, gabapentin; LCM, lacosamide; LEV, levetiracetam; LTG, lamotrigine; OXC, oxcarbazepine; PGB, pregabalin; PHB, phenobarbital; PHT, phenytoin; PRI, primidone; TPM, topiramate; VPA, valproate; ZNS, zonisamide.

**Figure 3.** Treatment patterns in adult men and women for A) first-line, B) second-line, and C) third-line treatment.\*

\*AEDs accounting for  $\geq 1\%$  of attempts in any patient group in any era.

AED, antiepileptic drug; CBZ, carbamazepine; CLB, clobazam; CLO, clonazepam; GBP, gabapentin; LCM, lacosamide; LEV, levetiracetam; LTG, lamotrigine; OXC, oxcarbazepine; PGB, pregabalin; PHT, phenytoin; TPM, topiramate; VPA, valproate; ZNS, zonisamide.

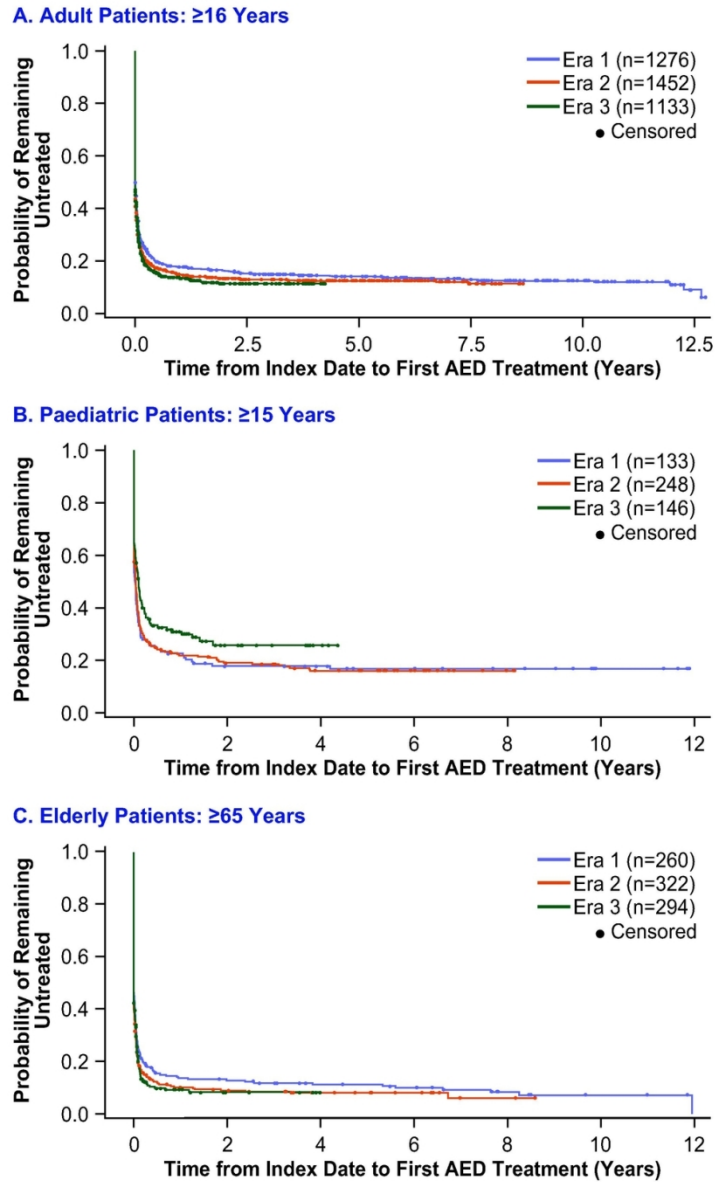

Figure 1. Time from first diagnosis to first AED prescription in A) adults (n=3861), B) children (n=527), and C) elderly (n=876).

84x142mm (300 x 300 DPI)



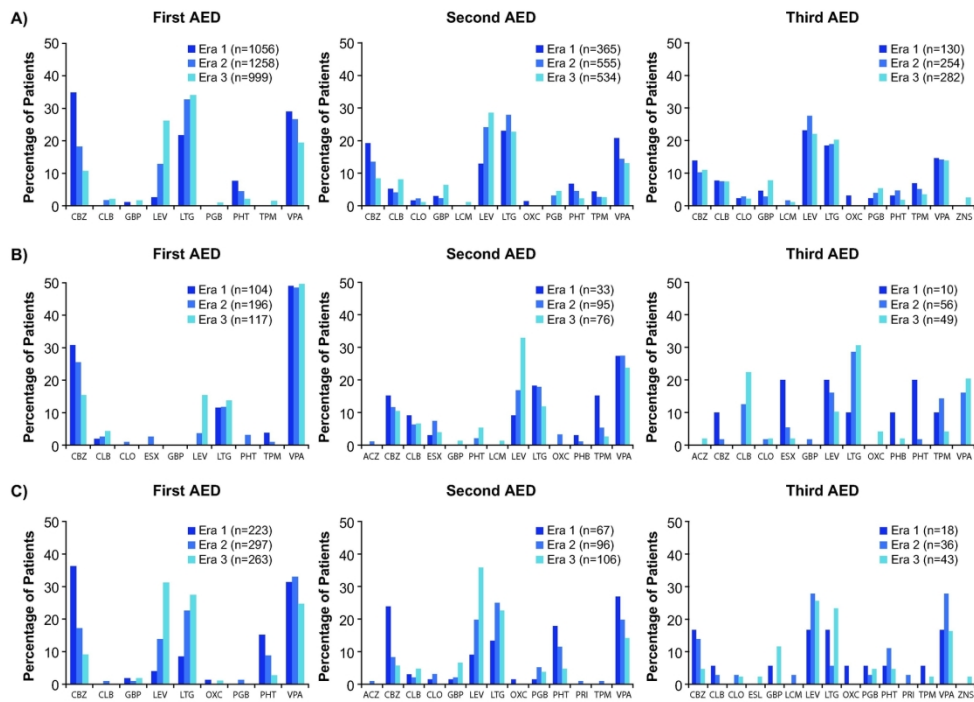

Figure 2. Treatment patterns by AED attempt in A) adults, B) children, and C) elderly.\*

175x123mm (300 x 300 DPI)

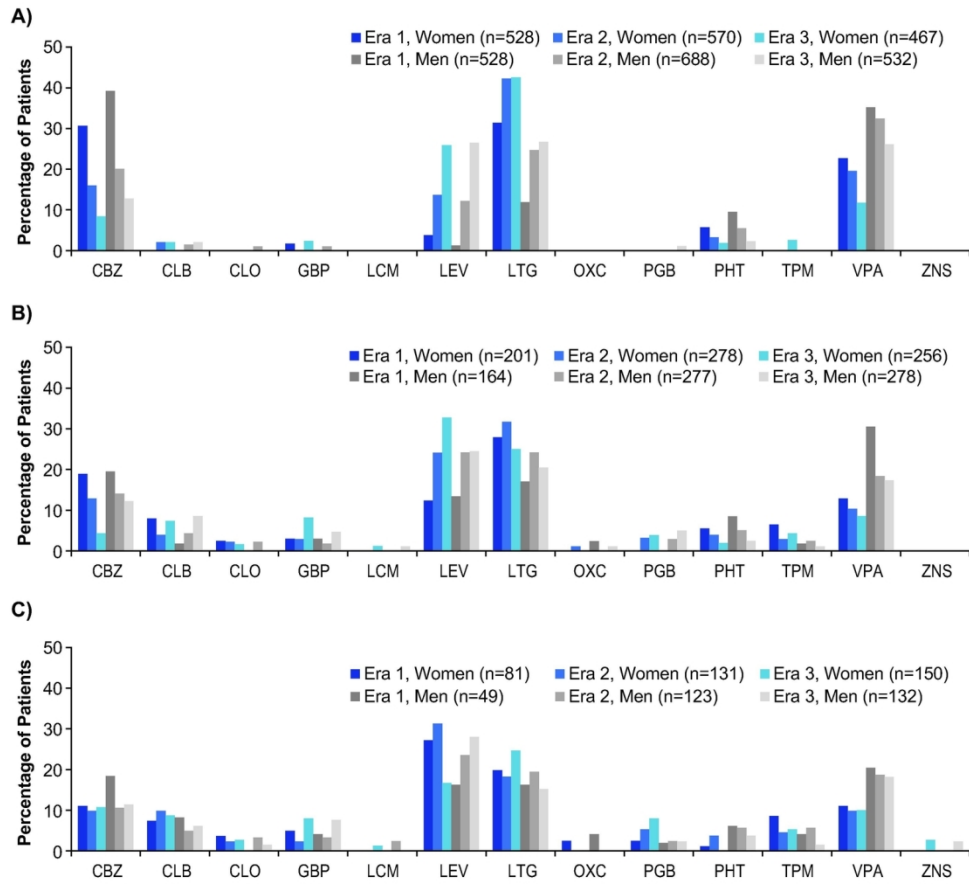

Figure 3. Treatment patterns in adult men and women for A) first-line, B) second-line, and C) third-line treatment.\*

139x125mm (300 x 300 DPI)

1  
2  
3  
4  
5  
6  
7  
8  
9  
10  
11  
12  
13  
14  
15  
16  
17  
18  
19  
20  
21  
22  
23  
24  
25  
26  
27  
28  
29  
30  
31  
32  
33  
34  
35  
36  
37  
38  
39  
40  
41  
42  
43  
44  
45  
46  
47  
48  
49  
50  
51  
52  
53  
54  
55  
56  
57  
58  
59  
60

**SUPPLEMENTARY INFORMATION**

Trends in antiepileptic drug treatment and effectiveness in clinical practice in  
England from 2003 to 2016

Graham Powell, John Logan, Victor Kiri, Simon Borghs

For peer review only

## Supplemental Tables

Supplementary Table S1 Diagnostic codes for epilepsy

| CODES                                                                    | TERM                                                                                                               | EPILEPSY TYPE |
|--------------------------------------------------------------------------|--------------------------------------------------------------------------------------------------------------------|---------------|
| <i>International Classification of Diseases, Tenth Revision (ICD-10)</i> |                                                                                                                    |               |
| G40                                                                      | Epilepsy                                                                                                           | Unspecified   |
| G40.0                                                                    | Localization-related (focal)(partial) idiopathic epilepsy and epileptic syndromes with seizures of localized onset | Partial       |
| G40.1                                                                    | Localization-related (focal)(partial) symptomatic epilepsy and epileptic syndromes with simple partial seizures    | Partial       |
| G40.2                                                                    | Localization-related (focal)(partial) symptomatic epilepsy and epileptic syndromes with complex partial seizures   | Partial       |
| G40.3                                                                    | Generalized idiopathic epilepsy and epileptic syndromes                                                            | Generalised   |
| G40.4                                                                    | Other generalized epilepsy and epileptic syndromes                                                                 | Generalised   |
| G40.5                                                                    | Special epileptic syndromes                                                                                        | Unspecified   |
| G40.6                                                                    | Grand mal seizures, unspecified (with or without petit mal)                                                        | Generalised   |
| G40.7                                                                    | Petit mal, unspecified, without grand mal seizures                                                                 | Unspecified   |
| G40.8                                                                    | Other epilepsy                                                                                                     | Unspecified   |
| G40.9                                                                    | Epilepsy, unspecified                                                                                              | Unspecified   |
| <b>READ codes</b>                                                        |                                                                                                                    |               |
| 1O30.00                                                                  | Epilepsy confirmed                                                                                                 | unspecified   |
| 667B.00                                                                  | Nocturnal epilepsy                                                                                                 | unspecified   |
| Eu80300                                                                  | [X]Acquired aphasia with epilepsy [Landau - Kleffner]                                                              | mixed         |
| Eu84200                                                                  | [X]Rett's syndrome                                                                                                 | generalised   |
| F035200                                                                  | Rasmussen syndrome                                                                                                 | partial       |
| F130600                                                                  | Aicardi Goutieres syndrome                                                                                         | mixed         |
| F132100                                                                  | Progressive myoclonic epilepsy                                                                                     | generalised   |
| F132111                                                                  | Unverricht - Lundborg disease                                                                                      | generalised   |
| F25..00                                                                  | Epilepsy                                                                                                           | unspecified   |
| F250.00                                                                  | Generalised nonconvulsive epilepsy                                                                                 | generalised   |
| F250000                                                                  | Petit mal (minor) epilepsy                                                                                         | unspecified   |
| F250100                                                                  | Pykno-epilepsy                                                                                                     | generalised   |
| F250400                                                                  | Juvenile absence epilepsy                                                                                          | generalised   |
| F250500                                                                  | Lennox-Gastaut syndrome                                                                                            | generalised   |
| F250y00                                                                  | Other specified generalised nonconvulsive epilepsy                                                                 | generalised   |
| F250z00                                                                  | Generalised nonconvulsive epilepsy NOS                                                                             | generalised   |
| F251.00                                                                  | Generalised convulsive epilepsy                                                                                    | generalised   |
| F251000                                                                  | Grand mal (major) epilepsy                                                                                         | generalised   |
| F251011                                                                  | Tonic-clonic epilepsy                                                                                              | generalised   |

| <b>CODES</b> | <b>TERM</b>                                                   | <b>EPILEPSY TYPE</b> |
|--------------|---------------------------------------------------------------|----------------------|
| F251100      | Neonatal myoclonic epilepsy                                   | generalised          |
| F251111      | Otohara syndrome                                              | mixed                |
| F251500      | Tonic-clonic epilepsy                                         | generalised          |
| F251y00      | Other specified generalised convulsive epilepsy               | generalised          |
| F251z00      | Generalised convulsive epilepsy NOS                           | generalised          |
| F254.00      | Partial epilepsy with impairment of consciousness             | partial              |
| F254000      | Temporal lobe epilepsy                                        | partial              |
| F254100      | Psychomotor epilepsy                                          | partial              |
| F254200      | Psychosensory epilepsy                                        | unspecified          |
| F254300      | Limbic system epilepsy                                        | partial              |
| F254z00      | Partial epilepsy with impairment of consciousness NOS         | partial              |
| F255.00      | Partial epilepsy without impairment of consciousness          | partial              |
| F255000      | Jacksonian, focal or motor epilepsy                           | partial              |
| F255011      | Focal epilepsy                                                | partial              |
| F255012      | Motor epilepsy                                                | partial              |
| F255100      | Sensory induced epilepsy                                      | unspecified          |
| F255200      | Somatosensory epilepsy                                        | partial              |
| F255300      | Visceral reflex epilepsy                                      | unspecified          |
| F255311      | Partial epilepsy with autonomic symptoms                      | partial              |
| F255400      | Visual reflex epilepsy                                        | unspecified          |
| F255500      | Unilateral epilepsy                                           | partial              |
| F255y00      | Partial epilepsy without impairment of consciousness OS       | partial              |
| F255z00      | Partial epilepsy without impairment of consciousness NOS      | partial              |
| F256.00      | Infantile spasms                                              | generalised          |
| F256.11      | Lightning spasms                                              | generalised          |
| F256.12      | West syndrome                                                 | generalised          |
| F256100      | Salaam attacks                                                | generalised          |
| F256z00      | Infantile spasms NOS                                          | generalised          |
| F259.00      | Early infant epileptic encephalopathy with suppression bursts | mixed                |
| F259.11      | Ohtahara syndrome                                             | mixed                |
| F25A.00      | Juvenile myoclonic epilepsy                                   | generalised          |
| F25B.00      | Alcohol-induced epilepsy                                      | unspecified          |
| F25C.00      | Drug-induced epilepsy                                         | unspecified          |
| F25D.00      | Menstrual epilepsy                                            | unspecified          |
| F25E.00      | Stress-induced epilepsy                                       | unspecified          |
| F25F.00      | Photosensitive epilepsy                                       | mixed                |
| F25G.00      | Severe myoclonic epilepsy in infancy                          | generalised          |
| F25G.11      | Dravet syndrome                                               | generalised          |

| <b>CODES</b> | <b>TERM</b>                                                  | <b>EPILEPSY TYPE</b> |
|--------------|--------------------------------------------------------------|----------------------|
| F25y.00      | Other forms of epilepsy                                      | unspecified          |
| F25y000      | Cursive (running) epilepsy                                   | partial              |
| F25y100      | Gelastic epilepsy                                            | partial              |
| F25y200      | Locl-rlt(foc)(part)idiop epilep&epilptic syn seiz locl onset | partial              |
| F25y400      | Benign Rolandic epilepsy                                     | partial              |
| F25y500      | Panayiotopoulos syndrome                                     | partial              |
| F25yz00      | Other forms of epilepsy NOS                                  | unspecified          |
| F25z.00      | Epilepsy NOS                                                 | unspecified          |
| Fyu5000      | [X]Other generalized epilepsy and epileptic syndromes        | generalised          |
| Fyu5100      | [X]Other epilepsy                                            | unspecified          |
| P228300      | Aicardi syndrome                                             | mixed                |
| PK61.00      | Sturge-Weber syndrome                                        | partial              |
| PKyz511      | Angelman syndrome                                            | generalised          |
| PKyz700      | Angelman's syndrome                                          | generalised          |
| PKyz711      | Angelman syndrome                                            | generalised          |
| SC20000      | Traumatic epilepsy                                           | partial              |
| ZS82.11      | Landau-Kleffner syndrome                                     | mixed                |

**Supplementary Table S2** READ codes used to capture the primary outcome

| CODE                                | TERM                                                |
|-------------------------------------|-----------------------------------------------------|
| <b>Active epilepsy and seizures</b> |                                                     |
| 1B1W.00                             | Transient epileptic amnesia                         |
| 1B27.00                             | Seizures in response to acute event                 |
| 1B64.00                             | Had a convulsion                                    |
| 1B64.11                             | Convulsion - symptom                                |
| 1B6B.00                             | Febrile convulsion                                  |
| 282..00                             | O/E - fit/convulsion                                |
| 282..11                             | O/E - a convulsion                                  |
| 282..13                             | O/E - a seizure                                     |
| 2827                                | O/E - febrile convulsion                            |
| 2828                                | Absence seizure                                     |
| 282Z.00                             | O/E - fit/convulsion NOS                            |
| 667D.00                             | Epilepsy control poor                               |
| 667Q.00                             | 1 to 12 seizures a year                             |
| 667R.00                             | 2 to 4 seizures a month                             |
| 667S.00                             | 1 to 7 seizures a week                              |
| 667T.00                             | Daily seizures                                      |
| 667V.00                             | Many seizures a day                                 |
| 667W.00                             | Emergency epilepsy treatment since last appointment |
| F132z12                             | Myoclonic seizure                                   |
| F250011                             | Epileptic absences                                  |
| F250200                             | Epileptic seizures - atonic                         |
| F250300                             | Epileptic seizures - akinetic                       |
| F251200                             | Epileptic seizures - clonic                         |
| F251300                             | Epileptic seizures - myoclonic                      |
| F251400                             | Epileptic seizures - tonic                          |
| F251600                             | Grand mal seizure                                   |
| F253.11                             | Status epilepticus                                  |
| F254400                             | Epileptic automatism                                |
| F254500                             | Complex partial epileptic seizure                   |
| F255600                             | Simple partial epileptic seizure                    |
| F25H.00                             | Generalised seizure                                 |
| F25X.00                             | Status epilepticus, unspecified                     |
| F25y300                             | Complex partial status epilepticus                  |
| F25z.11                             | Fit (in known epileptic) NOS                        |
| Fyu5200                             | [X]Other status epilepticus                         |
| Fyu5900                             | [X]Status epilepticus, unspecified                  |

| CODE    | TERM                                 |
|---------|--------------------------------------|
| Q480.00 | Convulsions in newborn               |
| Q480.12 | Seizures in newborn                  |
| R003.00 | [D]Convulsions                       |
| R003000 | [D]Convulsions, febrile              |
| R003011 | [D]Pyrexial convulsion               |
| R003100 | [D]Convulsions, infantile            |
| R003400 | [D]Nocturnal seizure                 |
| R003y00 | [D]Other specified convulsion        |
| R003z00 | [D]Convulsion NOS                    |
| R003z11 | [D]Seizure NOS                       |
| Ryu7100 | [X]Other and unspecified convulsions |
| 1B63.00 | Had a fit                            |
| 1B63.11 | Fit - had one, symptom               |
| 282..12 | O/E - a fit                          |
| 2822    | O/E - grand mal fit                  |
| 2823    | O/E - petit mal fit                  |
| 2824    | O/E - focal (Jacksonian) fit         |
| 2824.11 | O/E - Jacksonian fit                 |
| 2824.12 | O/E - focal fit                      |
| 2825    | O/E - psychomotor fit                |
| Q480.11 | Fits in newborn                      |
| R003200 | [D]Fit                               |
| F252.00 | Petit mal status                     |
| F253.00 | Grand mal status                     |
| F256.00 | Infantile spasms                     |
| F256.11 | Lightning spasms                     |
| F256z00 | Infantile spasms NOS                 |
| F256100 | Salaam attacks                       |



### Supplementary Figures

**Supplementary Figure S1** AED trends in boys and girls (<16 years of age) in A) first-line and B) second-line treatment.

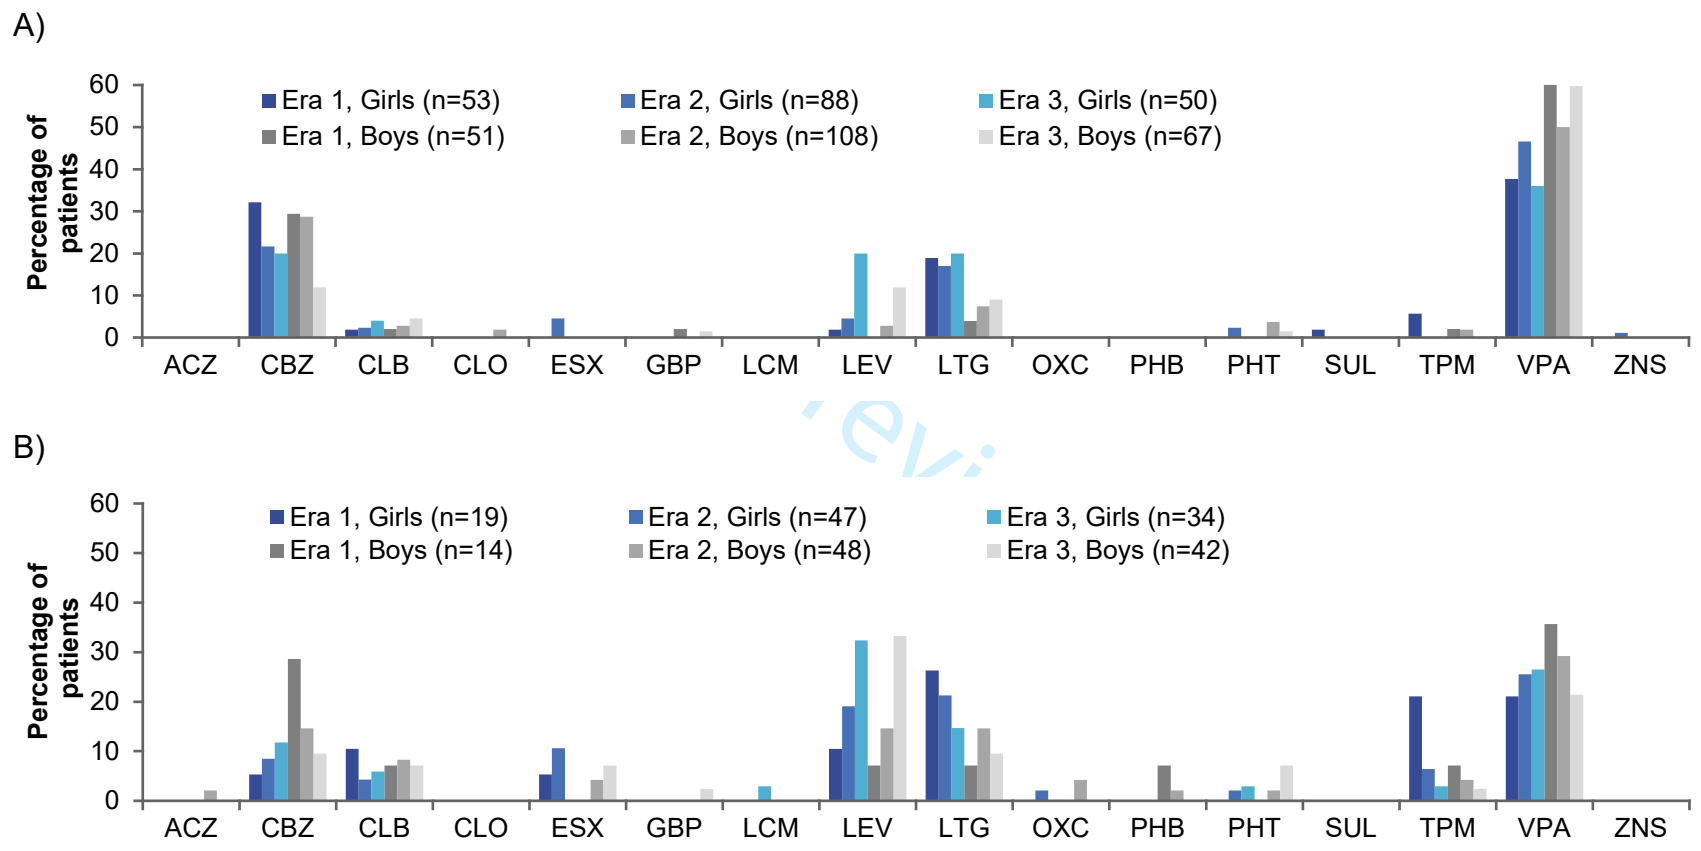

ACZ, acetazolamide; CBZ, carbamazepine; CLB, clobazam; CLO, clonazepam; GBP, gabapentin; LCM, lacosamide; LEV, levetiracetam; LTG, lamotrigine; OXC, oxcarbazepine; PGB, pregabalin; PHT, phenytoin; PRI, primidone; TPM, topiramate; VPA, valproate.

**Supplementary Figure S2** AED trends in elderly men and women ( $\geq 65$  years of age) in A) first-line and B) second-line treatment.

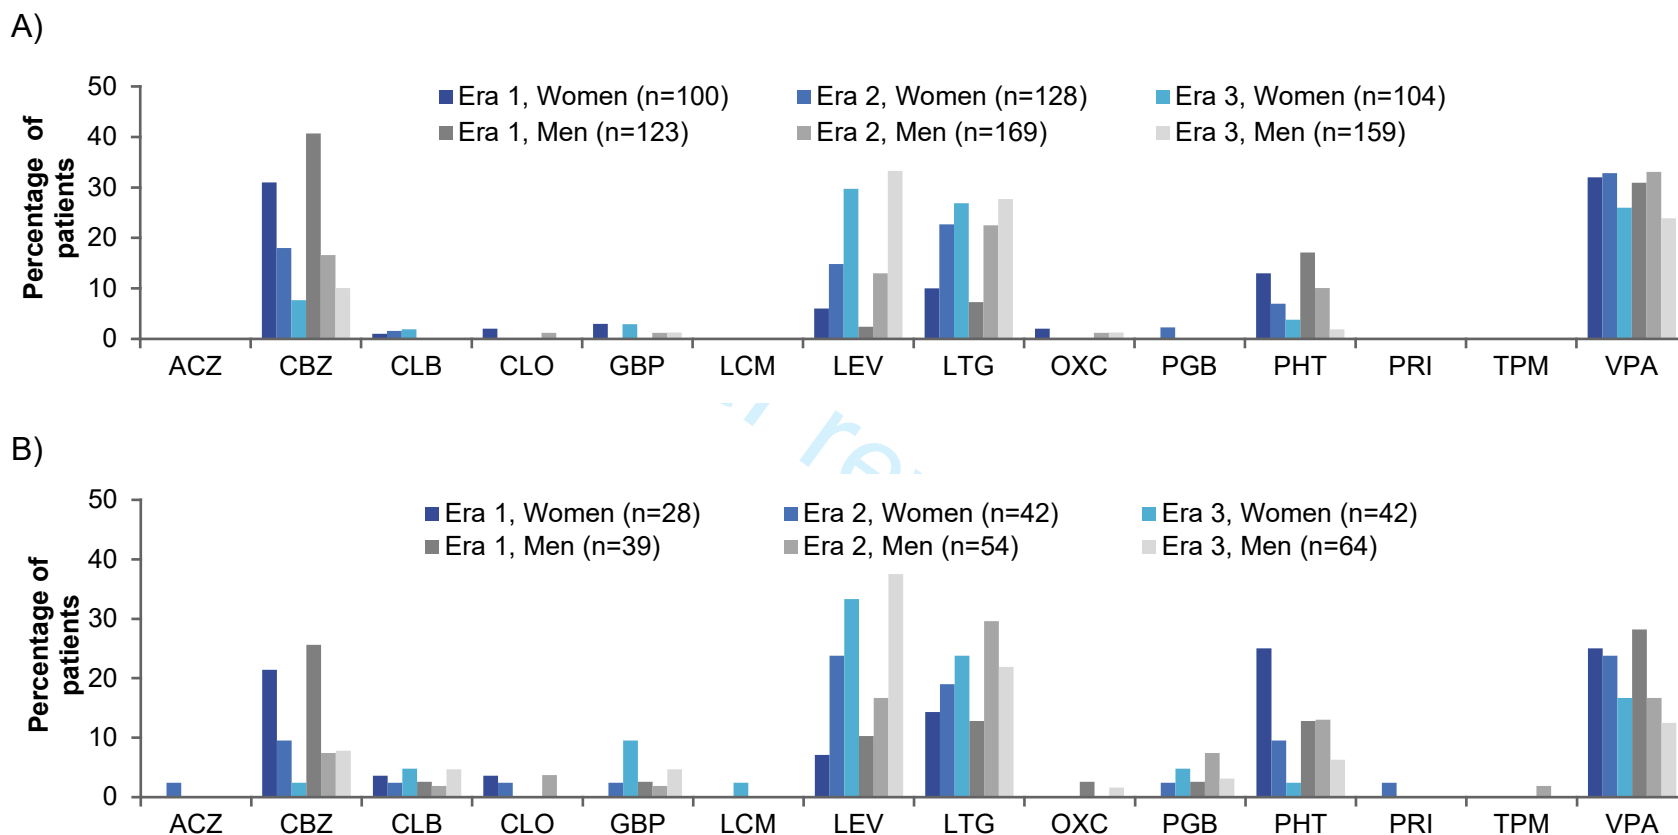

ACZ, acetazolamide; CBZ, carbamazepine; CLB, clobazam; CLO, clonazepam; GBP, gabapentin; LCM, lacosamide; LEV, levetiracetam; LTG, lamotrigine; OXC, oxcarbazepine; PGB, pregabalin; PHT, phenytoin; PRI, primidone; TPM, topiramate; VPA, valproate.

STROBE Statement—Checklist of items that should be included in reports of *cohort studies*

|                              | Item No | Recommendation                                                                                                                                                                                                                                                                                                         | Page No  |
|------------------------------|---------|------------------------------------------------------------------------------------------------------------------------------------------------------------------------------------------------------------------------------------------------------------------------------------------------------------------------|----------|
| <b>Title and abstract</b>    | 1       | (a) Indicate the study's design with a commonly used term in the title or the abstract<br>(b) Provide in the abstract an informative and balanced summary of what was done and what was found                                                                                                                          | 2<br>2   |
| <b>Introduction</b>          |         |                                                                                                                                                                                                                                                                                                                        |          |
| Background/rationale         | 2       | Explain the scientific background and rationale for the investigation being reported                                                                                                                                                                                                                                   | 4        |
| Objectives                   | 3       | State specific objectives, including any prespecified hypotheses                                                                                                                                                                                                                                                       | 4        |
| <b>Methods</b>               |         |                                                                                                                                                                                                                                                                                                                        |          |
| Study design                 | 4       | Present key elements of study design early in the paper                                                                                                                                                                                                                                                                | 4-5      |
| Setting                      | 5       | Describe the setting, locations, and relevant dates, including periods of recruitment, exposure, follow-up, and data collection                                                                                                                                                                                        | 4-6      |
| Participants                 | 6       | (a) Give the eligibility criteria, and the sources and methods of selection of participants. Describe methods of follow-up<br>(b) For matched studies, give matching criteria and number of exposed and unexposed                                                                                                      | 5-6      |
| Variables                    | 7       | Clearly define all outcomes, exposures, predictors, potential confounders, and effect modifiers. Give diagnostic criteria, if applicable                                                                                                                                                                               | 5-6      |
| Data sources/<br>measurement | 8*      | For each variable of interest, give sources of data and details of methods of assessment (measurement). Describe comparability of assessment methods if there is more than one group                                                                                                                                   | 4-6      |
| Bias                         | 9       | Describe any efforts to address potential sources of bias                                                                                                                                                                                                                                                              |          |
| Study size                   | 10      | Explain how the study size was arrived at                                                                                                                                                                                                                                                                              | 5-6      |
| Quantitative variables       | 11      | Explain how quantitative variables were handled in the analyses. If applicable, describe which groupings were chosen and why                                                                                                                                                                                           |          |
| Statistical methods          | 12      | (a) Describe all statistical methods, including those used to control for confounding<br>(b) Describe any methods used to examine subgroups and interactions<br>(c) Explain how missing data were addressed<br>(d) If applicable, explain how loss to follow-up was addressed<br>(e) Describe any sensitivity analyses | 6        |
| <b>Results</b>               |         |                                                                                                                                                                                                                                                                                                                        |          |
| Participants                 | 13*     | (a) Report numbers of individuals at each stage of study—eg numbers potentially eligible, examined for eligibility, confirmed eligible, included in the study, completing follow-up, and analysed<br>(b) Give reasons for non-participation at each stage<br>(c) Consider use of a flow diagram                        | 7        |
| Descriptive data             | 14*     | (a) Give characteristics of study participants (eg demographic, clinical, social) and information on exposures and potential confounders<br>(b) Indicate number of participants with missing data for each variable of interest<br>(c) Summarise follow-up time (eg, average and total amount)                         | 7-9<br>9 |
| Outcome data                 | 15*     | Report numbers of outcome events or summary measures over time                                                                                                                                                                                                                                                         | 10-13    |

|                                      |                          |    |                                                                                                                                                                                                                                                                                                                                                                                                               |       |
|--------------------------------------|--------------------------|----|---------------------------------------------------------------------------------------------------------------------------------------------------------------------------------------------------------------------------------------------------------------------------------------------------------------------------------------------------------------------------------------------------------------|-------|
| 1<br>2<br>3<br>4<br>5<br>6<br>7<br>8 | Main results             | 16 | (a) Give unadjusted estimates and, if applicable, confounder-adjusted estimates and their precision (eg, 95% confidence interval). Make clear which confounders were adjusted for and why they were included<br>(b) Report category boundaries when continuous variables were categorized<br>(c) If relevant, consider translating estimates of relative risk into absolute risk for a meaningful time period | 10-13 |
| 9<br>10<br>11                        | Other analyses           | 17 | Report other analyses done—eg analyses of subgroups and interactions, and sensitivity analyses                                                                                                                                                                                                                                                                                                                |       |
| 12                                   | <b>Discussion</b>        |    |                                                                                                                                                                                                                                                                                                                                                                                                               |       |
| 13<br>14                             | Key results              | 18 | Summarise key results with reference to study objectives                                                                                                                                                                                                                                                                                                                                                      | 13-15 |
| 15<br>16                             | Limitations              | 19 | Discuss limitations of the study, taking into account sources of potential bias or imprecision. Discuss both direction and magnitude of any potential bias                                                                                                                                                                                                                                                    | 16-17 |
| 17<br>18<br>19                       | Interpretation           | 20 | Give a cautious overall interpretation of results considering objectives, limitations, multiplicity of analyses, results from similar studies, and other relevant evidence                                                                                                                                                                                                                                    | 17    |
| 20<br>21                             | Generalisability         | 21 | Discuss the generalisability (external validity) of the study results                                                                                                                                                                                                                                                                                                                                         |       |
| 22                                   | <b>Other information</b> |    |                                                                                                                                                                                                                                                                                                                                                                                                               |       |
| 23<br>24<br>25                       | Funding                  | 22 | Give the source of funding and the role of the funders for the present study and, if applicable, for the original study on which the present article is based                                                                                                                                                                                                                                                 | 18    |

\*Give information separately for exposed and unexposed groups.

**Note:** An Explanation and Elaboration article discusses each checklist item and gives methodological background and published examples of transparent reporting. The STROBE checklist is best used in conjunction with this article (freely available on the Web sites of PLoS Medicine at <http://www.plosmedicine.org/>, Annals of Internal Medicine at <http://www.annals.org/>, and Epidemiology at <http://www.epidem.com/>). Information on the STROBE Initiative is available at <http://www.strobe-statement.org>.

# BMJ Open

## Trends in antiepileptic drug treatment and effectiveness in clinical practice in England from 2003 to 2016: a retrospective cohort study using electronic medical records

|                                 |                                                                                                                                                                                                                                   |
|---------------------------------|-----------------------------------------------------------------------------------------------------------------------------------------------------------------------------------------------------------------------------------|
| Journal:                        | <i>BMJ Open</i>                                                                                                                                                                                                                   |
| Manuscript ID                   | bmjopen-2019-032551.R1                                                                                                                                                                                                            |
| Article Type:                   | Original research                                                                                                                                                                                                                 |
| Date Submitted by the Author:   | 27-Aug-2019                                                                                                                                                                                                                       |
| Complete List of Authors:       | Powell, Graham; University of Liverpool, Department of Molecular and Clinical Pharmacology, Institute of Translational Medicine<br>Logan, John; Stats4Pharma<br>Kiri, Victor; FV & JK Consulting Ltd<br>Borghs, Simon; UCB Pharma |
| <b>Primary Subject Heading</b>: | Neurology                                                                                                                                                                                                                         |
| Secondary Subject Heading:      | General practice / Family practice, Medical management                                                                                                                                                                            |
| Keywords:                       | drug resistance, refractoriness, remission, Epilepsy < NEUROLOGY, seizure freedom, treatment patterns                                                                                                                             |
|                                 |                                                                                                                                                                                                                                   |

SCHOLARONE™  
Manuscripts

1  
2  
3  
4 **Trends in antiepileptic drug treatment and effectiveness in clinical practice in**  
5 **England from 2003 to 2016: a retrospective cohort study using electronic**  
6 **medical records**  
7  
8

9  
10 Graham Powell,<sup>1</sup> John Logan,<sup>2</sup> Victor Kiri,<sup>3</sup> Simon Borghs<sup>4</sup>  
11

12  
13 <sup>1</sup> Department of Molecular and Clinical Pharmacology, Institute of Translational  
14 Medicine, University of Liverpool, Liverpool, Merseyside, UK  
15

16  
17 <sup>2</sup> Stats4Pharma, Cork, Republic of Ireland  
18

19  
20 <sup>3</sup> FV & JK Consulting Ltd, Guildford, Surrey, UK  
21

22  
23 <sup>4</sup> UCB Pharma, Slough, Berkshire, UK  
24

25  
26 Corresponding author: Simon Borghs, UCB Pharma, 208 Bath Road, Slough SL1  
27 3WE, UK; Simon.Borghs@ucb.com; Tel: +44 1753 44 7813  
28

29  
30  
31  
32  
33 Word count: 3857  
34

35  
36 Tables/Figures: 5 (Supplemental items: 2 tables, 2 figures)  
37

38  
39 References: 32  
40

41 **Keywords:** Drug resistance; refractoriness; remission; epilepsy; seizure freedom;  
42 treatment patterns  
43  
44  
45  
46  
47  
48  
49  
50  
51  
52  
53  
54  
55  
56  
57  
58  
59  
60

## ABSTRACT

**Objective** To assess the evolution of antiepileptic drug (AED) treatment patterns and seizure outcomes in England from 2003 to 2016.

**Design, setting and participants** Retrospective cohort study of electronic medical records from Clinical Practice Research Datalink and National Health Service Digital Hospital Episode Statistics databases. Patients newly diagnosed with epilepsy were identified and followed until end of data availability. Three eras were defined starting 1 April 2003 (first National Institute for Health and Care Excellence [NICE] guideline); 1 September 2007 (Standard and New Antiepileptic Drugs publication); 1 January 2012 (second NICE guideline).

**Outcome measures** Time from diagnosis to first AED; AED sequence; time from first AED to first 1-year remission period (no new AED attempts and no seizure-related healthcare events); time from first AED to refractoriness (third AED attempt regardless of reason); Kaplan-Meier analysis of time-to-event variables.

**Results** 4388 patients were included (mean follow-up: 6.8, 4.2, and 1.7 years by era). 84.6% of adults ( $\geq 16$  years), 75.5% of children ( $< 16$ ), and 89.1% of elderly subgroup (65+) received treatment within 1 year; rates were generally stable over time. Treatment trends included reduced carbamazepine use (adult first-line, era 1: 34.9%; era 3: 10.7%) and phenytoin, earlier-line and increased levetiracetam use (adult first-line, era 1: 2.6%; era 3: 26.2%) and lamotrigine (particularly adults and elderly subgroup), and larger number of different AEDs used. Valproate use shifted somewhat to later lines. Rates of 1-year remission within 2 years of starting treatment increased in adults (era 1: 71.9%; era 3: 81.4%) and elderly (era 1: 76.1%; era 3: 81.7%). Overall, 55.5% of patients relapsed after achieving 1-year remission. Refractoriness rates remained stable over time (~26% of adults within 5 years).

**Conclusion** Treatment trends often were not aligned with era-relevant guidance. However, our results suggest a slight improvement in epilepsy treatment outcomes over the 13-year period.

## ARTICLE SUMMARY

### Strengths and limitations of this study

- Use of the Clinical Practice Research Datalink and National Health Service Digital Hospital Episode Statistics databases allowed access to a large national pool of patients for identification of those newly diagnosed with epilepsy.
- Treatment eras were delineated by epilepsy guideline updates to allow capture of changes in antiepileptic drug treatment practice.
- The stringency of diagnostic criteria may limit the generalisability of the data.
- The nature of the data is prone to incomplete or incorrect medical records and coding, lack of specificity, and captures prescriptions but not prescription fills.
- The definition of remission was based on health care consultations, with 1 year possibly too short to be considered for remission; and drug resistance was based on switching antiepileptic drugs without taking into account the reasons for treatment changes, which were unknown but likely driven by lack of effect and poor tolerability.



## INTRODUCTION

The introduction of new antiepileptic drugs (AEDs) since 2003 has been accompanied by studies of the comparative efficacy, safety, and tolerability of older and newer AEDs,[1-3] as well as by evolving clinical practice guidelines that incorporate newer medications into recommendations for epilepsy treatment.[4-6] Treatment patterns would be expected to reflect the latest guidance for individual AEDs in epilepsy management, but scant information is available to assess alignment in clinical practice. A number of studies have reported an increase in the use of newer AEDs prescribed for first-line treatment in new-onset epilepsy in UK primary care settings[7, 8] and across European Union countries.[9]

Use of newer AEDs with reported similar or improved efficacy and better tolerability than older AEDs would be expected to benefit overall epilepsy treatment success and patient outcomes. However, literature suggests that there has been no meaningful improvement in epilepsy treatment-related outcomes[1, 10-12] and a notable portion of patients still fail first-line AED therapy.[13, 14] The objective of this study was to evaluate AED treatment patterns and seizure outcomes in England over three time periods from 2003 to 2016, using electronic medical record data, to provide further insights into the management of patients newly diagnosed with epilepsy.

## METHODS

### Study design

This was an exploratory, retrospective cohort analysis of primary care electronic medical records (EMRs) from the UK Clinical Practice Research Datalink (CPRD) and secondary care claims data from the National Health Service (NHS) Digital Hospital Episode Statistics (HES) databases. The CPRD contained over 4 million active patient records (and more than 11 million overall) drawn from 674 UK primary care practices, representing approximately 7% of the UK population, in 2015

1  
2  
3  
4 [15]; these numbers have since grown.[16] Data that may be captured in the CPRD  
5 primary care data include general practitioner (GP) prescriptions, diagnoses,  
6 procedures, and referrals, coded as Read codes (a system of clinical terms used in  
7 UK primary care EMRs),[17-19] as well as UK Quality and Outcomes Framework  
8 (QOF) indicators, which were designed to reward quality care by GPs and may offer  
9 additional clinical information (in the case of epilepsy, the indicators concern seizure  
10 frequency). The HES database contains details of all secondary care admissions,  
11 outpatient appointments, and Accident & Emergency attendances at NHS hospitals  
12 in England.[20] Within this database, diagnoses are coded using the *International*  
13 *Classification of Diseases, Tenth Edition (ICD-10)* and procedures are coded using  
14 the *Office of Population, Censuses and Surveys Classification of Surgical Operations*  
15 *and Procedures, Fourth Revision*.

16  
17  
18  
19  
20  
21  
22  
23  
24  
25  
26  
27  
28  
29  
30  
31  
32  
33  
34  
35  
36  
37  
38  
39  
40  
41  
42  
43  
44  
45  
46  
47  
48  
49  
50  
51  
52  
53  
54  
55  
56  
57  
58  
59  
60  
AED treatment patterns and seizure outcomes in England were assessed over three 4.5-year eras. Era 1 (first guideline era) included dates from 1 April 2003 to 31 August 2007 and encompassed the publication of the first National Institute for Health and Care Excellence (NICE) epilepsy guidance.[4, 21, 22] These guidelines recommended carbamazepine (CBZ) or sodium valproate (VPA) as first-line treatment for focal (partial-onset) and generalised seizures. Era 2 (intermediate era) was defined as 1 September 2007 to 31 December 2011, and captured updated guidance that recommended lamotrigine (LTG) or CBZ as first line for focal (partial-onset) seizures and VPA for generalised seizures based on a large randomized pragmatic trial (Standard and New Antiepileptic Drugs [SANAD]).[1] Era 3 (newer guideline era) spanned the timeframe from 1 January 2012 to 31 May 2016, with the second NICE epilepsy guidance recommending CBZ or LTG as first-line treatment for focal seizures, VPA for generalised seizures, and advice to be given to women of childbearing potential regarding foetal risks of malformation and neurodevelopmental impairments with VPA.[6, 23] A 2015 update warned against prescribing VPA to pregnant women and those of childbearing potential unless other AEDs were ineffective or not tolerated (in 2018 guidelines, VPA is contraindicated in girls and women of childbearing potential).[24]

## Cohort selection

Patients with epilepsy newly diagnosed between 1 April 2003 and 31 May 2016 (date of last available CPRD practice data) were included in the study. Diagnosis was operationalised as an incident epilepsy diagnosis code (online supplementary table S1), with evidence of a neurologist visit on the same date or in the preceding 3 months, as assessed in HES data or primary care referral data using June 2016 data sets, and constituted the index date. Patients were assigned to a treatment era based upon their index date (ie, the index date fell within one of the three defined treatment guideline eras). Those who had started an AED attempt less than 3 months prior to a diagnosis were included. An AED attempt was defined on the start date of an AED prescription that a patient had never used before, and maintained for at least 31 days, as identified in primary care records. A pre-index period of at least 2 years was required with their practice's data flagged as up-to-standard. Patients were excluded if they had an epilepsy diagnosis at any time before the index date, or AED treatment during the 2-year pre-index period. Included patients were followed until data were no longer available, owing either to death or to leaving their general practitioner practice or date of last CPRD data (31 May 2016).

Three age cohorts were considered: adults aged  $\geq 16$  years, children  $\geq 2$  to  $< 16$  years of age, and the elderly,  $\geq 65$  years of age (a subset of adult patients).

## Outcome measures

The primary outcome was time to 1-year remission from seizures for all treated patients, starting from the time of first AED attempt until the first 1-year period of remission. One-year remission was defined as having no new AED attempts, and the absence of all seizure-related healthcare events (ie, seizure-related hospitalisation or seizure-related GP or outpatient visit; for instance a GP visit with a diagnosis recorded as '1B64.00 – had a convulsion'), QOF data and Read codes (online supplementary table S2) indicating a seizure at any time for at least 1 year. A subsequent occurrence of any of these events is defined as a relapse. Outcomes also included time from diagnosis to first AED prescription (all patients); treatment

1  
2  
3  
4 patterns by era, age, and sex cohort; and time from first AED prescription to  
5 refractoriness (treated patients only), which was defined as a third distinct AED  
6 attempt as identified in primary care records. The end of AED exposure and  
7 treatment as poly/monotherapy were not assessed.  
8  
9  
10

## 11 12 13 14 **Statistical analysis**

15  
16  
17 Descriptive statistics were used to summarise both continuous variables and  
18 categorical variables such as mean, standard deviation (SD), median, and  
19 percentages. Analyses were conducted on unmatched cohorts and reported results  
20 are unadjusted. Outcomes were evaluated using Kaplan-Meier analysis.  
21  
22  
23

24  
25 The protocol for this study was reviewed and approved by the Independent  
26 Scientific Advisory Committee, the CPRD scientific/ethics committee.  
27  
28  
29

## 30 31 32 **Patient involvement statement**

33  
34  
35 This research was conducted without patient involvement in the design or  
36 interpretation of this study, or in the writing and editing of this document.  
37  
38  
39

## 40 41 42 **RESULTS**

### 43 44 45 **Study participants**

46  
47 Overall, of 137,267 patients with an epilepsy diagnosis code in the data, 4388  
48 patients (adults n=3861; children n=527) met the study inclusion criteria and were  
49 available for analysis. Mean follow-up was 6.8 years (era 1), 4.2 years (era 2), and  
50 1.7 years (era 3). Baseline characteristics were largely as expected for diagnosed  
51 patients (overall population: mean age at diagnosis, 41.4 years; 85.0% of patients  
52 with  $\geq 1$  AED treatment; 78.4% with unspecified epilepsy) (table 1). There appeared  
53 to be higher rates of comorbidities, reflected by epilepsy-specific comorbidity index  
54 scores, and lower rates of unspecified epilepsy diagnosis in era 3 compared with era  
55  
56  
57  
58  
59  
60

1  
2  
3  
4 1. There were minor changes in the regional make-up of CPRD data; for example in  
5  
6 England, the number of practices participating in CPRD generally decreased in  
7  
8 eastern regions and increased in London and southern regions over time (ie, in the  
9  
10 study data set, London-based practices represent 13.7% of practices contributing  
11  
12 data for 2005 whereas they represent 19.0% of those contributing for 2015); other  
13  
14 regions remained relatively stable.  
15  
16

17  
18 **Table 1** Baseline characteristics of the sample population.  
19

|                                                               | <b>Adults</b><br><b>(≥16 years)</b><br><b>n=3861</b> | <b>Children</b><br><b>(&lt;16 years)</b><br><b>n=527</b> | <b>Elderly</b><br><b>subgroup*</b><br><b>(≥65 years)</b><br><b>n=876</b> |
|---------------------------------------------------------------|------------------------------------------------------|----------------------------------------------------------|--------------------------------------------------------------------------|
| Age at diagnosis, years, mean (SD)                            | 45.9 (20.4)                                          | 8.5 (4.0)                                                | 74.7 (7.0)                                                               |
| Female, n (%)                                                 | 1845 (47.8)                                          | 244 (46.3)                                               | 372 (42.5)                                                               |
| No. diagnosed (%)                                             |                                                      |                                                          |                                                                          |
| Era 1, n (% of era)                                           | 1276 (33.0)                                          | 133 (25.2)                                               | 260 (29.7)                                                               |
| Era 2, n (% of era)                                           | 1452 (37.6)                                          | 248 (47.1)                                               | 322 (36.8)                                                               |
| Era 3, n (% of era)                                           | 1133 (29.3)                                          | 146 (27.7)                                               | 294 (33.6)                                                               |
| Germaine-Smith epilepsy-specific comorbidity index, mean (SD) |                                                      |                                                          |                                                                          |
| Era 1, n (% of era)                                           | 0.6 (1.5)                                            | 0.3 (1.0)                                                | 1.4 (2.3)                                                                |
| Era 2, n (% of era)                                           | 0.8 (1.8)                                            | 0.2 (0.7)                                                | 2.0 (2.3)                                                                |
| Era 3, n (% of era)                                           | 1.1 (2.4)                                            | 0.4 (1.2)                                                | 2.7 (2.9)                                                                |
| Epilepsy type                                                 |                                                      |                                                          |                                                                          |

|                                   |             |            |            |
|-----------------------------------|-------------|------------|------------|
| Generalised, n (%)                | 324 (8.4)   | 72 (13.7)  | 65 (7.4)   |
| Era 1, n (% of era)               | 91 (7.1)    | 15 (11.3)  | 15 (5.8)   |
| Era 2, n (% of era)               | 119 (8.2)   | 44 (17.7)  | 22 (6.8)   |
| Era 3, n (% of era)               | 114 (10.1)  | 13 (8.9)   | 28 (9.5)   |
| Focal (partial-onset), n (%)      | 475 (12.3)  | 76 (14.4)  | 114 (13.0) |
| Era 1, n (% of era)               | 162 (12.7)  | 15 (11.3)  | 46 (17.7)  |
| Era 2, n (% of era)               | 153 (10.5)  | 31 (12.5)  | 29 (9.0)   |
| Era 3, n (% of era)               | 160 (14.1)  | 30 (20.5)  | 39 (13.3)  |
| Unspecified                       | 3062 (79.3) | 379 (71.9) | 697 (79.6) |
| Era 1, n (% of era)               | 1023 (80.2) | 103 (77.4) | 199 (76.5) |
| Era 2, n (% of era)               | 1180 (81.3) | 173 (69.8) | 271 (84.2) |
| Era 3, n (% of era)               | 859 (75.8)  | 103 (70.5) | 227 (77.2) |
| At least one AED treatment, n (%) | 3313 (85.8) | 417 (79.1) | 783 (89.4) |
| Total follow-up, patient-years†   | 16,483.92   | 2363.94    | 3257.28    |
| Mean follow-up, years             | 4.3         | 4.5        | 3.7        |
| Era 1, n (% of era)               | 6.7         | 7.3        | 6.0        |
| Era 2, n (% of era)               | 4.1         | 4.6        | 3.7        |
| Era 3, n (% of era)               | 1.7         | 1.8        | 1.7        |

Era 1, 1 April 2003 to 31 August 2007 (first NICE guidance); era 2, 1 September 2007 to 31 December 2011 (SANAD); era 3, 1 January 2012 to study 31 May 2016 (second NICE guidance).

\*Elderly patients are a subset of the adult patient population.

†Total follow-up, patient-years: calculated by adding the follow-up time for all patients.

1  
2  
3  
4 AED, antiepileptic drug.  
5  
6  
7

8  
9 Many patients (n=4456) who met inclusion criteria were excluded owing to pre-  
10 diagnosis AED use, primarily with AEDs that have multiple indications (eg, valproate,  
11 carbamazepine, lamotrigine). Because of the required 2-year baseline period, no 0-  
12 or 1-year-old children were included in the sample.  
13  
14  
15  
16  
17  
18

### 19 **Time from diagnosis to first AED prescription**

20  
21  
22 Kaplan-Meier estimates revealed that 84.6% of adults, 75.5% of children, and 89.1%  
23 of the elderly subgroup received AED treatment within 1 year of index date (figure 1).  
24 Treatment rates from era 1 to era 3 appeared to increase slightly in adults (82.3% to  
25 86.6%) and the elderly subgroup (86.3% to 90.8%), and to decrease slightly in  
26 children (77.4% to 69.2%).  
27  
28  
29  
30  
31  
32  
33  
34  
35

### 36 **Treatment patterns over time**

37  
38 Analysis of treatment patterns over time in adults shows a large shift away from CBZ  
39 (adult first-line share, era 1: 34.9%; era 3: 10.7%) and phenytoin (PHT; adult first-line  
40 share, era 1: 7.6%; era 3: 2.1%), and toward earlier and increased use of  
41 levetiracetam (LEV; adult first-line share, era 1: 2.6%; era 3: 26.2%) (figure 2A). The  
42 use of first-line VPA remained relatively stable over eras 1 and 2, and decreased in  
43 era 3. AED treatment patterns appeared to be far more stable in children than adults,  
44 with use of first-line VPA remaining high over time (first-line share: in children, era 1:  
45 49.0%; era 3: 49.6%; in adults, era 1: 29.0%; era 3, 19.4%; figure 2B). Nevertheless,  
46 the use of CBZ decreased in favour of earlier use of LEV (CBZ first-line share, era 1:  
47 30.8%; era 3: 15.4%; LEV first-line share, era 1: 0%; era 3: 15.4%). These AED  
48 patterns were consistent for second-line treatment in children. Treatment pattern  
49 changes in the elderly subgroup were similar but more pronounced than in the  
50 overall adult patient population. In the elderly subgroup, CBZ use fell in all treatment  
51 lines (first-line share, era 1: 36.3%; era 3: 9.1%; second-line share, era 1: 23.9%; era  
52  
53  
54  
55  
56  
57  
58  
59  
60

3: 5.7%; third-line share, era 1: 16.7%; era 3: 4.7%) in favour of earlier and increased use of lamotrigine (LTG) and LEV (LTG first-line share, era 1: 8.5%; era 3: 27.4%; LEV first-line share, era 1: 4.0%; era 3: 31.2%; figure 2C).

Analysis of treatment patterns by sex indicated that in adults, women were prescribed first-line VPA and CBZ less often and LTG more often than men—a finding that remained stable over time (figure 3). The trends in VPA and LTG use were mostly intact through third-line AED (figure 3). In children, generally LEV and LTG were more common and VPA less common for girls than boys across eras as well as through second-line AED (supplemental figure 1). In the elderly subgroup, first-line treatment patterns were comparable between men and women (supplemental figure 2).

### One-year remission rates

One-year remission rates, within 1 or 2 years of treatment initiation, increased somewhat over time in adults and the elderly subgroup, but were more variable in children (table 2). The percentage of patients achieving a 1-year period of remission within 1 year of starting treatment increased from era 1 to era 3 in all three age cohorts. The most substantial increase (era 1 to era 3) was observed in the elderly subgroup (31.5% to 47.3%; a 50.3% increase from era 1). The percentage of adults and the elderly subgroup achieving 1-year remission within 2 years of starting treatment was higher than within 1 year and increased over time (era 1 to era 3: 71.9% to 81.4% adults; 76.1% to 81.7% elderly). In children, there was a slight decrease in remission rates within 2 years of treatment from era 1 to era 3 (table 2). Overall, 55.5% of patients relapsed after achieving 1-year remission.

**Table 2** Treatment outcomes by study population and era

|  | Adults<br>(≥16 years) | Children<br>(<16 years) | Elderly<br>subgroup*<br>(≥65 years) |
|--|-----------------------|-------------------------|-------------------------------------|
|--|-----------------------|-------------------------|-------------------------------------|



|                                                                              | n=3313      | n=417      | n=783      |
|------------------------------------------------------------------------------|-------------|------------|------------|
| <b>Rate of 1-year remission within 1 or 2 years of treatment</b>             |             |            |            |
| Patients with at least one period of 1-year remission, <sup>†</sup> n (%)    | 2430 (73.3) | 317 (76.0) | 536 (68.5) |
| Of these patients, at least one relapse, <sup>†</sup> n (%)                  | 1362 (56.0) | 163 (51.4) | 310 (57.8) |
| 1-year period of remission 1 year from treatment start (KM estimate)         | 35.2%       | 40.1%      | 36.3%      |
| Era 1 <sup>‡</sup>                                                           | 31.6%       | 36.4%      | 31.5%      |
| Era 2 <sup>‡</sup>                                                           | 34.7%       | 41.9%      | 32.8%      |
| Era 3 <sup>‡</sup>                                                           | 42.0%       | 40.8%      | 47.3%      |
| 1-year period of remission within 2 years of treatment start (KM estimate)   | 75.3%       | 75.9%      | 78.4%      |
| Era 1 <sup>‡</sup>                                                           | 71.9%       | 73.0%      | 76.1%      |
| Era 2 <sup>‡</sup>                                                           | 75.3%       | 78.3%      | 78.2%      |
| Era 3 <sup>‡</sup>                                                           | 81.4%       | 72.8%      | 81.7%      |
| <b>Rate of refractoriness within 3 years of starting first AED treatment</b> |             |            |            |
| Patients refractory 3 years from start of treatment (KM estimate)            | 17.5%       | 23.8%      | 11.9%      |
| Era 1 <sup>‡</sup>                                                           | 17.3%       | 20.8%      | 11.1%      |
| Era 2 <sup>‡</sup>                                                           | 17.4%       | 24.3%      | 13.4%      |
| Era 3 <sup>‡</sup>                                                           | 17.6%       | (n<10)     | 11.2%      |

Era 1, 1 April 2003 to 31 August 2007 (first NICE guidance); era 2, 1 September 2007 to 31 December 2011 (SANAD); era 3, 1 January 2012 to study 31 May 2016 (second NICE guidance).

\*Elderly patients are a subset of the adult patient population.

†Raw figures, not adjusted for differential follow-up between eras.

‡Number of patients diagnosed in era 1, 2, and 3, respectively, and received treatment: adults, n=1097, 1254, and 962; children, n=110, 204, and 103; elderly subgroup, n=234, 291, and 258.

AED, antiepileptic drug; KM, Kaplan-Meier estimate.

### **Time from first AED treatment to refractoriness**

Overall, a similar percentage (about 17% to 18%) of adult patients became refractory within 3 years of first starting treatment across the different eras (table 2).

Approximately 25% to 26% of adults were treatment refractory after 5 years (data not shown). The subgroup of elderly patients was less likely to become treatment refractory than all adults or children (table 2).

### **DISCUSSION**

The results of this analysis suggest that there has been some improvement in epilepsy outcomes, reflected by shorter times to 1-year remission (no new AED attempts or seizure-related healthcare events for at least 1 year) over the 13-year period. Various reasons may contribute to this observation, including improved diagnosis of epilepsy and differential diagnosis of non-epilepsy disorders, more active epilepsy management with personalised treatment, and wider use of newer, better-tolerated AEDs, particularly to replace enzyme-inducing drugs in the elderly subgroup who are most susceptible to risks associated with enzyme induction.[25] Although our study assessed treatment patterns by age group and sex, it did not assess whether prescribing is targeted based upon other patient characteristics.

The decreasing adherence of prescribing to treatment guidelines over the time course of this study suggests guidelines are not keeping up with clinical practice and a possible issue in guideline writing. The nature of evidence that contributes to guidelines might play a role here. In epilepsy, the reliance of guidelines primarily on

1  
2  
3  
4 randomized controlled trials, which are scarce, may have led to relevant information  
5 being ignored. The observed major changes in prescription trends during era 3 are at  
6 odds with NICE guidelines, which suggest prescribing CBZ or LTG as first-line  
7 treatment in children and adults with newly diagnosed focal seizures, and VPA for  
8 those newly diagnosed with generalised seizures.[6] Analysis of first-line treatment  
9 patterns over time showed a reduction in VPA use in era 3, a large shift away from  
10 CBZ and PHT in all treatment lines, and a trend toward earlier and increased usage  
11 of LEV in adults, particularly the elderly subgroup.[6] Although the sharp decrease in  
12 PHT aligns with 2012 NICE guidelines,[6] possibly reflecting a change in AEDs used  
13 in acute settings or a shift to non-enzyme active AEDs (nEAAEDs) in older patients,  
14 the decrease in CBZ and increase in LEV do not align with treatment guidelines.  
15  
16  
17  
18  
19  
20  
21  
22  
23

24 For elderly patients, 2012 NICE guidelines recommend CBZ as an extended  
25 release formulation.[6] Preferential use of CBZ in older patients was reported in a  
26 study of CPRD data from 2001 to 2010, which found that patients receiving enzyme-  
27 inducing AEDs (EIAEDs: CBZ, 63.3%; PHT, 35.3%) were older and had more  
28 comorbid illness; the study also reported the use of EIAEDs resulted in higher  
29 healthcare costs compared with nEAAEDs.[25] Our findings also show that CBZ was  
30 most often prescribed for the elderly subgroup during era 1 (2003-2007). Given the  
31 higher susceptibility to risks associated with enzyme induction, as well as increased  
32 costs, a shift to nEAAEDs would appear a rational change that is reflected in era 3  
33 prescribing trends.  
34  
35  
36  
37  
38  
39  
40  
41

42 In children, treatment patterns were more stable, which may reflect the  
43 situation that fewer new AEDs have become available for this population. Limited  
44 choices may be related to the more stringent criteria necessary for drug approval,  
45 with more complex trial designs and challenges in recruitment. The stability of VPA  
46 use in children may be related to its broad spectrum activity when diagnosis is  
47 uncertain.  
48  
49  
50  
51  
52

53 In women, use of VPA greatly diminished across eras, lending support to a  
54 database study in the US that reported decreased VPA use among adult women.[26]  
55 These findings are perhaps not surprising given the teratogenic profile of VPA and  
56 increased warnings associated with VPA in girls and women of childbearing  
57  
58  
59  
60

1  
2  
3  
4 potential. In 2018, the Medicines and Healthcare products Regulatory Agency  
5 advised against the use of VPA in girls and women of childbearing potential;[27]  
6 thus, one might anticipate further declines in its use going forward.  
7  
8  
9

10 Our study shows that comorbidity burden increased across eras, indicating  
11 that patients newly diagnosed in era 3 were sicker than patients newly diagnosed in  
12 era 1 or 2. The reasons for this trend are not discerned, but may reflect a changing  
13 make-up of practices contributing CPRD data, societal changes in levels of physical  
14 inactivity and diet, improved diagnosis by healthcare providers, and increased  
15 treatment-seeking behaviour by patients. A similar observed increase in comorbidity  
16 burden from 2004 to 2014 has been reported in a UK population with cardiovascular  
17 disease.[28]  
18  
19  
20  
21  
22  
23  
24

25 A longitudinal cohort study describing seizure freedom rates over 30 years  
26 reported a virtually unchanged seizure-freedom rate, and a decrease in the  
27 probability of achieving seizure freedom with each unsuccessful AED regimen  
28 prescribed.[11] The study reported 61% to 64% of patients achieved 1-year seizure  
29 freedom over time.[11] Study authors concluded that despite changing treatment  
30 patterns and greater use of newer AEDs, as observed in the present study, no  
31 meaningful improvements in long-term outcomes had occurred. In contrast, our  
32 study found an improvement in outcomes, with a higher proportion of patients  
33 entering remission, nearly half of whom subsequently relapsed. Across eras, an  
34 increasing proportion of patients achieved 1-year remission (eg, 71.9% to 81.4% for  
35 adult subgroup). There are a number of differences that may explain the discrepancy  
36 in results between these studies. First, the prior study assessed 1-year seizure  
37 freedom before study end (thus excluding those who were seizure-free for  $\geq 12$   
38 months who relapsed before study end), whereas our study assessed 1-year  
39 remission from AED initiation. Because patients with longer follow-up also have more  
40 time and opportunity to relapse, in the prior study 1-year seizure freedom favours  
41 patients with shorter follow-up (ie, those diagnosed in later eras), which is not the  
42 case in the current study. By using Kaplan-Meier methods to adjust for this  
43 differential follow-up time between eras, we found increasing remission rates over  
44 time in adult and elderly subgroups. Other notable differences include time periods of  
45 the study cohorts (1982–2012 vs 2003–2012), available AEDs, reported study  
46  
47  
48  
49  
50  
51  
52  
53  
54  
55  
56  
57  
58  
59  
60

1  
2  
3  
4 population (overall vs age-specific subgroups), settings (single epilepsy centre in  
5 Glasgow vs general practitioner practices across England), and data source (medical  
6 records and notes vs structured electronic medical records). It is possible that  
7 reporting outcomes for an overall population may have masked trends in the adult  
8 population, as our study found treatment patterns and remission rates in children  
9 were relatively stable over time periods.  
10  
11  
12  
13  
14

15 The proportion of patients who were refractory within 3 years of first starting  
16 AED treatment was similar across eras, although percentages varied somewhat  
17 according to age group. The trend for increasing remission rates and stable  
18 refractoriness rates would appear to be a contradiction. A possible explanation may  
19 be that patients progress through 3 AEDs treatments via more active management.  
20 Although these patients would meet the definition for refractory epilepsy, the AEDs  
21 may represent more specifically chosen, better tolerated treatments that lead to  
22 improved remission rates. Further, improved tolerability of newer AEDs may permit  
23 higher dosing, which may lead to improved efficacy outcomes. Thus, the increasing  
24 rates of remission over time may reflect the improved tolerability and efficacy of  
25 newer AEDs used in the later eras.  
26  
27  
28  
29  
30  
31  
32  
33  
34

35 Study interpretation is limited by a number of factors. The conservative,  
36 stringent diagnostic criteria may have limited the generalisability of the data, as the  
37 study selection rate was approximately 25% to 30% of the expected incidence  
38 rate.[29] The accuracy of electronic medical records data is limiting, as instances  
39 whereby a seizure or epilepsy code was used after a non-seizure event could be  
40 present. The requirement for a neurologist visit as part of our epilepsy diagnosis  
41 criteria was intended to maximise the accuracy of the diagnosis. Additionally, the  
42 epilepsy type was not usually discernible from medical record recording practices in  
43 our study, with 70% to 80% of patients having been classified as having an  
44 unspecified epilepsy diagnosis. Because patient characteristics by AED were not  
45 assessed, the accuracy of selected AED(s) is not known (all prescriptions reflect  
46 data from general practitioners).  
47  
48  
49  
50  
51  
52  
53  
54  
55  
56

57 Outcome definitions may also contribute to limitations. Our definition of  
58 remission was based on healthcare consultations, and it could be argued that the 1-  
59  
60

1  
2  
3  
4 year time period was insufficient to be considered as 'remission',[30] or that basing  
5 remission on healthcare encounters rather than information about seizure frequency  
6 may be unspecific. This proxy was designed to use as much information as is  
7 captured in the databases. No Read or *ICD-10* codes record seizure frequency. The  
8 QOF data, which is intended to record seizure frequency, was found to be very  
9 poorly populated. EMR free text is not available from CPRD. Further, the definition of  
10 seizure freedom has evolved, with the ILAE proposing a 'rule of three', including the  
11 absence of seizures for at least the previous 12 months OR for three times the  
12 longest pre-treatment interval between seizures, whichever is greater.[31] In our  
13 study, drug resistance (refractoriness) was based on switching AEDs and did not  
14 take into account the reasons for treatment changes, which are not explicitly  
15 recorded in CPRD (eg, adverse events/tolerability, pregnancy) but likely were  
16 predominantly driven by a combination of lack of efficacy and poor tolerability. This  
17 definition differs from that proposed by the ILAE in 2010: 'Drug resistant epilepsy  
18 may be defined as failure of adequate trials of two tolerated and appropriately  
19 chosen and used AED schedules (whether as monotherapies or in combination) to  
20 achieve sustained seizure freedom.'[31]

21  
22  
23  
24  
25  
26  
27  
28  
29  
30  
31  
32  
33  
34 Our study is also limited by incomplete information regarding prescribing data  
35 from general practitioners, particularly lack of information regarding patient  
36 adherence and the appropriateness of AED selection based on patient  
37 characteristics. Indeed, database studies are subject to miscoding and missing or  
38 incomplete information. In our description of the data, we found that epilepsy is often  
39 coded with no more specificity than simply 'epilepsy', perhaps the result of the  
40 unwillingness or lack of necessity to code more specifically, on the part of  
41 physicians. Shifts in the make-up of practices supplying data to CPRD (eg, reflected  
42 by capture of higher rates of comorbidities and specified epilepsy diagnosis, and  
43 shifts in the regional make up of CPRD data, which may be associated with regional  
44 treatment practices) over time may have introduced unmeasured bias in patient  
45 baseline characteristics. Changes to data availability and accuracy over eras may  
46 have affected results, with a prior study noting the improved accuracy of  
47 administrative or registry data in later years.[32] A crucial limitation is that cohorts  
48 are unmatched and analyses unadjusted; thus, there is no statistical basis for  
49  
50  
51  
52  
53  
54  
55  
56  
57  
58  
59  
60

1  
2  
3  
4 comparisons between outcomes. As such, our findings are exploratory in nature and  
5 should be interpreted with caution.  
6  
7

8  
9  
10 Despite these potential limitations, our study suggests an evolution of AED  
11 treatment patterns and AED effectiveness over a 15-year period in clinical practice in  
12 England. Major changes in treatment patterns, particularly a reduction in CBZ and  
13 PHT use in favour of earlier and increased use of LEV, were observed. Although our  
14 study did not assess the use of particular AEDs based on patient characteristics or  
15 appropriateness, we generally found a reduction in the use of EIAEDs in the elderly  
16 subgroup and VPA in women, in keeping with newer treatment recommendations. In  
17 contrast to other studies reporting no meaningful improvement in the overall epilepsy  
18 population,[10, 11] we found an increase in 1-year remission rates following AED  
19 initiation in adults, which, given the limitations of the current study, will need to be  
20 further studied. Overcoming the limitations of the current study would require a data  
21 source that captures relevant diagnosis and outcomes data, particularly reasons for  
22 treatment change and remission, in more depth; while also still being generalizable  
23 and with a sufficient sample size. The lack of availability of such data is currently a  
24 major hurdle to comparative effectiveness research and real world evidence in  
25 epilepsy.  
26  
27  
28  
29  
30  
31  
32  
33  
34  
35  
36

37 Although some improvement in epilepsy treatment outcomes was observed, a  
38 sizable proportion of patients with epilepsy remain uncontrolled on first- and second-  
39 line treatment, indicating a continued need for innovations for patients living with  
40 poorly controlled epilepsy.  
41  
42  
43  
44  
45  
46  
47

## 48 **ACKNOWLEDGMENTS**

49  
50 This study is based in part on data from the General Practice Research Database  
51 obtained under license from the UK Medicines and Healthcare products Regulatory  
52 Agency. However, the interpretation and conclusions contained in this report are  
53 those of the authors alone. The authors acknowledge Cheryl Hudson (UCB Pharma,  
54 Slough UK) for publication coordination, and Lynne Isbell, PhD, CMPP and Richard  
55  
56  
57  
58  
59  
60

1  
2  
3  
4 Fay, PhD, CMPP (Evidence Scientific Solutions, Philadelphia, PA, USA) for writing  
5 assistance, which was funded by UCB Pharma.  
6  
7

8 **Contributors** GP and SB conceived of the study and had a role in study design. JL  
9 and VK conducted data collection, extraction, and analysis of the data. GP, SB, and  
10 JL contributed to data interpretation. All authors contributed to the review and  
11 revision of the manuscript and approved of the final manuscript for publication.  
12  
13  
14

15  
16 **Funding** This work was supported by UCB Pharma. Contributions from UCB  
17 Pharma include study design and interpretation (S Borghs, as an employee), data  
18 collection and analysis (J Logan and V Kiri, as paid consultants), and review,  
19 revision, and approval of the final manuscript (S Borghs, J Logan, and V Kiri).  
20  
21  
22

23  
24 **Competing interests** G Powell is a paid medical consultant for UCB Pharma. J  
25 Logan and V Kiri are paid consultants for UCB Pharma. S Borghs is an employee of  
26 UCB Pharma.  
27  
28

29  
30 **Patient consent for publication** Not required.  
31  
32

33 **Data sharing statement** The CPRD and HES datasets used in this study are  
34 available from the National Institute for Health Research, the Medicines & Healthcare  
35 products Regulatory Agency, and NHS Digital, respectively.  
36  
37  
38  
39  
40  
41  
42  
43  
44  
45  
46  
47  
48  
49  
50  
51  
52  
53  
54  
55  
56  
57  
58  
59  
60



## REFERENCES

- 1 Marson AG, Al-Kharusi AM, Alwaidh M, et al. The SANAD study of effectiveness of carbamazepine, gabapentin, lamotrigine, oxcarbazepine, or topiramate for treatment of partial epilepsy: an unblinded randomised controlled trial. *Lancet* 2007;369:1000–15. doi: 10.1016/S0140-6736(07)60460-7
- 2 Brodie MJ, Mintzer S, Pack AM, et al. Enzyme induction with antiepileptic drugs: cause for concern? *Epilepsia* 2013;54:11–27. doi: 10.1111/j.1528-1167.2012.03671.x
- 3 Johannessen Landmark C, Patsalos PN. Drug interactions involving the new second- and third-generation antiepileptic drugs. *Expert Rev Neurother* 2010;10:119–40. doi: 10.1586/ern.09.136
- 4 Stokes T, Shaw EJ, Juarez-Garcia A, et al. The diagnosis and management of the epilepsies in adults and children in primary and secondary care. London: Royal College of General Practitioners, 2004.
- 5 Glauser T, Ben-Menachem E, Bourgeois B, et al. Updated ILAE evidence review of antiepileptic drug efficacy and effectiveness as initial monotherapy for epileptic seizures and syndromes. *Epilepsia* 2013;54:551–63. doi: 10.1111/epi.12074
- 6 National Institute for Health and Care Excellence. Epilepsies: diagnosis and management, CG137. 2012. <https://www.nice.org.uk/guidance/cg137> (accessed 15 Jan 2019).
- 7 Pickrell WO, Lacey AS, Thomas RH, et al. Trends in the first antiepileptic drug prescribed for epilepsy between 2000 and 2010. *Seizure* 2014;23:77–80. doi: 10.1016/j.seizure.2013.09.007
- 8 Nicholas JM, Ridsdale L, Richardson MP, et al. Trends in antiepileptic drug utilisation in UK primary care 1993-2008: cohort study using the General Practice Research Database. *Seizure* 2012;21:466–70. doi: 10.1016/j.seizure.2012.04.014
- 9 de Groot MC, Schuerch M, de Vries F, et al. Antiepileptic drug use in seven electronic health record databases in Europe: a methodologic comparison. *Epilepsia* 2014;55:666–73. doi: 10.1111/epi.12557
- 10 Loscher W, Schmidt D. Modern antiepileptic drug development has failed to deliver: ways out of the current dilemma. *Epilepsia* 2011;52:657–78. doi: 10.1111/j.1528-1167.2011.03024.x

- 1  
2  
3  
4 11 Chen Z, Brodie MJ, Liew D, et al. Treatment outcomes in patients with newly  
5 diagnosed epilepsy treated with established and new antiepileptic drugs: a 30-year  
6 longitudinal cohort study. *JAMA Neurol* 2018;75:279–86. doi:  
7  
8 10.1001/jamaneurol.2017.3949  
9  
10 12 Kwan P, Brodie MJ. Clinical trials of antiepileptic medications in newly diagnosed  
11 patients with epilepsy. *Neurology* 2003;60:S2–12. doi:  
12  
13 10.1212/wnl.60.11\_suppl\_4.s2  
14  
15 13 Karlsson L, Wettermark B, Tomson T. Drug treatment in patients with newly  
16 diagnosed unprovoked seizures/epilepsy. *Epilepsy Res* 2014;108:902–8. doi:  
17  
18 10.1016/j.epilepsyres.2014.03.004  
19  
20 14 Bonnett LJ, Tudur Smith C, Donegan S, et al. Treatment outcome after failure of  
21 a first antiepileptic drug. *Neurology* 2014;83:552–60. doi:  
22  
23 10.1212/WNL.0000000000000673  
24  
25 15 Herrett E, Gallagher AM, Bhaskaran K, et al. Data resource profile: Clinical  
26 Practice Research Datalink (CPRD). *Int J Epidemiol* 2015;44:827–36. doi:  
27  
28 10.1093/ije/dyv098  
29  
30 16 Clinical Practice Research Datalink. Data. 2019. <https://cprd.com/Data> (accessed 9  
31 Apr 2019).  
32  
33 17 Booth N. What are Read codes? *Health Libr Rev* 1994;11:177–82.  
34  
35 18 Bradley SH, Lawrence NR, Carder P. Using primary care data for health research  
36 in England – an overview. *Future Healthc J* 2018;5:207–12. doi:  
37  
38 10.7861/futurehosp.5-3-207  
39  
40 19 Springate DA, Kontopantelis E, Ashcroft DM, et al. ClinicalCodes: an online  
41 clinical codes repository to improve the validity and reproducibility of research using  
42 electronic medical records. *PLoS One* 2014;9:e99825. doi:  
43  
44 10.1371/journal.pone.0099825  
45  
46 20 NHS Digital. Hospital Episode Statistics (HES). 2019. [https://digital.nhs.uk/data-  
47 and-information/data-tools-and-services/data-services/hospital-episode-statistics](https://digital.nhs.uk/data-and-information/data-tools-and-services/data-services/hospital-episode-statistics)  
48 (accessed 9 Apr 2019).  
49  
50 21 National Institute for Health and Care Excellence. The Epilepsies: The diagnosis  
51 and management of the epilepsies in adults and children in primary and secondary  
52 care, CG20. 2004. <https://www.nice.org.uk/guidance/cg20> (accessed 15 Jan 2019).  
53  
54  
55  
56  
57  
58  
59  
60

- 1  
2  
3  
4 22 Perucca E. NICE guidance on newer drugs for epilepsy in adults. *BMJ*  
5 2004;328:1273–4. doi: 10.1136/bmj.328.7451.1273  
6  
7 23 Nunes VD, Sawyer L, Neilson J, et al. Diagnosis and management of the  
8 epilepsies in adults and children: summary of updated NICE guidance. *BMJ*  
9 2012;344:e281. doi: 10.1136/bmj.e281  
10  
11 24 Medicines and Healthcare products Regulatory Agency. Medicines related to  
12 valproate: risk of abnormal pregnancy outcomes. 2015. [https://www.gov.uk/drug-](https://www.gov.uk/drug-safety-update/medicines-related-to-valproate-risk-of-abnormal-pregnancy-outcomes)  
13 [safety-update/medicines-related-to-valproate-risk-of-abnormal-pregnancy-outcomes](https://www.gov.uk/drug-safety-update/medicines-related-to-valproate-risk-of-abnormal-pregnancy-outcomes)  
14 (accessed 6 Feb 2019).  
15  
16 25 Borghs S, Thieffry S, Noack-Rink M, et al. Health care cost associated with the  
17 use of enzyme-inducing and non-enzyme-active antiepileptic drugs in the UK: a long-  
18 term retrospective matched cohort study. *BMC Neurol* 2017;17:59. doi:  
19 10.1186/s12883-017-0837-y  
20  
21 26 Thurman D, Faught E, Kim H, et al. Antiepileptic drug treatment patterns in  
22 women of childbearing age with epilepsy: a US database analysis [abstract].  
23 American Epilepsy Society 71st Annual Meeting; 1–5 Dec 2017; Washington DC.  
24 [https://www.aesnet.org/meetings\\_events/annual\\_meeting\\_abstracts/view/342678](https://www.aesnet.org/meetings_events/annual_meeting_abstracts/view/342678)  
25  
26 27 Medicines and Healthcare products Regulatory Agency. Valproate medicines  
27 (Epilim, Depakote): contraindicated in women and girls of childbearing potential  
28 unless conditions of Pregnancy Prevention Programme are met. 2018.  
29 [https://www.gov.uk/drug-safety-update/valproate-medicines-epilim-depakote-](https://www.gov.uk/drug-safety-update/valproate-medicines-epilim-depakote-contraindicated-in-women-and-girls-of-childbearing-potential-unless-conditions-of-pregnancy-prevention-programme-are-met)  
30 [contraindicated-in-women-and-girls-of-childbearing-potential-unless-conditions-of-](https://www.gov.uk/drug-safety-update/valproate-medicines-epilim-depakote-contraindicated-in-women-and-girls-of-childbearing-potential-unless-conditions-of-pregnancy-prevention-programme-are-met)  
31 [pregnancy-prevention-programme-are-met](https://www.gov.uk/drug-safety-update/valproate-medicines-epilim-depakote-contraindicated-in-women-and-girls-of-childbearing-potential-unless-conditions-of-pregnancy-prevention-programme-are-met) (accessed 13 Feb 2019).  
32  
33 28 Tran J, Norton R, Conrad N, et al. Patterns and temporal trends of comorbidity  
34 among adult patients with incident cardiovascular disease in the UK between 2000  
35 and 2014: a population-based cohort study. *PLoS Med* 2018;15:e1002513. doi:  
36 10.1371/journal.pmed.1002513  
37  
38 29 Joint Epilepsy Council of the UK and Ireland. Epilepsy prevalence, incidence and  
39 other statistics. 2011.  
40 [http://www.epilepsyscotland.org.uk/pdf/Joint\\_Epilepsy\\_Council\\_Prevalence\\_and\\_Inci-](http://www.epilepsyscotland.org.uk/pdf/Joint_Epilepsy_Council_Prevalence_and_Incidence_September_11_(3).pdf)  
41 [dence\\_September\\_11\\_\(3\).pdf](http://www.epilepsyscotland.org.uk/pdf/Joint_Epilepsy_Council_Prevalence_and_Incidence_September_11_(3).pdf) (accessed 15 Jan 2019).  
42  
43 30 Sillanpää M, Schmidt D, Saarinen MM, et al. Remission in epilepsy: how long is  
44 enough? *Epilepsia* 2017;58:901–06. doi: 10.1111/epi.13732  
45  
46  
47  
48  
49  
50  
51  
52  
53  
54  
55  
56  
57  
58  
59  
60

1  
2  
3  
4 31 Kwan P, Arzimanoglou A, Berg AT, et al. Definition of drug resistant epilepsy:  
5 consensus proposal by the ad hoc Task Force of the ILAE Commission on  
6 Therapeutic Strategies. *Epilepsia* 2010;51:1069–77. doi: 10.1111/j.1528-  
7 1167.2009.02397.x  
8  
9

10  
11 32 Burns EM, Rigby E, Mamidanna R, et al. Systematic review of discharge coding  
12 accuracy. *J Public Health (Oxf)* 2012;34:138–48. doi: 10.1093/pubmed/fdr054  
13  
14  
15  
16  
17  
18  
19  
20  
21  
22  
23  
24  
25  
26  
27  
28  
29  
30  
31  
32  
33  
34  
35  
36  
37  
38  
39  
40  
41  
42  
43  
44  
45  
46  
47  
48  
49  
50  
51  
52  
53  
54  
55  
56  
57  
58  
59  
60

For peer review only

## FIGURE LEGENDS

**Figure 1** Time from first diagnosis to first AED prescription in A) adults (n=3861), B) children (n=527), and C) elderly subgroup (n=876).

AED, antiepileptic drug.

**Figure 2** Treatment patterns by AED attempt in A) adults, B) children, and C) elderly subgroup.\*

\*AEDs accounting for  $\geq 1\%$  of attempts in any patient group in any era.

ACZ, acetazolamide; AED, antiepileptic drug; CBZ, carbamazepine; CLB, clobazam; CLO, clonazepam; ESL, eslicarbazepine; GBP, gabapentin; LCM, lacosamide; LEV, levetiracetam; LTG, lamotrigine; OXC, oxcarbazepine; PGB, pregabalin; PHB, phenobarbital; PHT, phenytoin; PRI, primidone; TPM, topiramate; VPA, valproate; ZNS, zonisamide.

**Figure 3.** Treatment patterns in adult men and women for A) first-line, B) second-line, and C) third-line treatment.\*

\*AEDs accounting for  $\geq 1\%$  of attempts in any patient group in any era.

For first-line treatment, the proportions of women vs men receiving AEDs were, for era 1: VPA, 22.7% vs 35.2%; CBZ, 30.7% vs 39.2%, LTG, 31.4% vs 11.9%; and for era 3: VPA, 11.8% vs 26.1%; CBZ, 8.4% vs 12.8%; LTG, 42.6% vs 26.7%.

AED, antiepileptic drug; CBZ, carbamazepine; CLB, clobazam; CLO, clonazepam; GBP, gabapentin; LCM, lacosamide; LEV, levetiracetam; LTG, lamotrigine; OXC, oxcarbazepine; PGB, pregabalin; PHT, phenytoin; TPM, topiramate; VPA, valproate; ZNS, zonisamide.

**A. Adult Patients:  $\geq 16$  Years**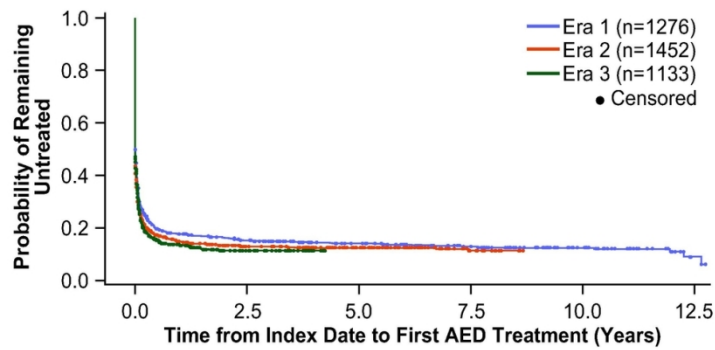**B. Paediatric Patients:  $\geq 15$  Years**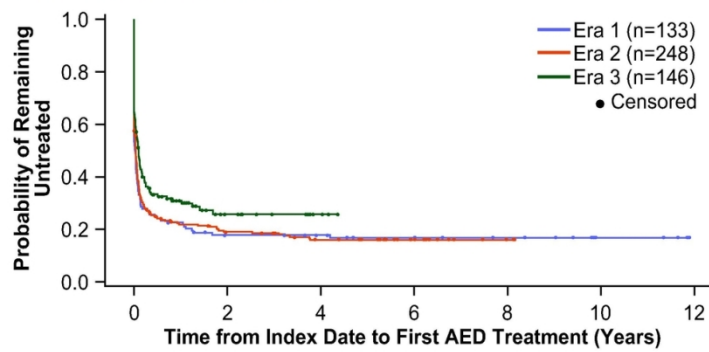**C. Elderly Patients:  $\geq 65$  Years**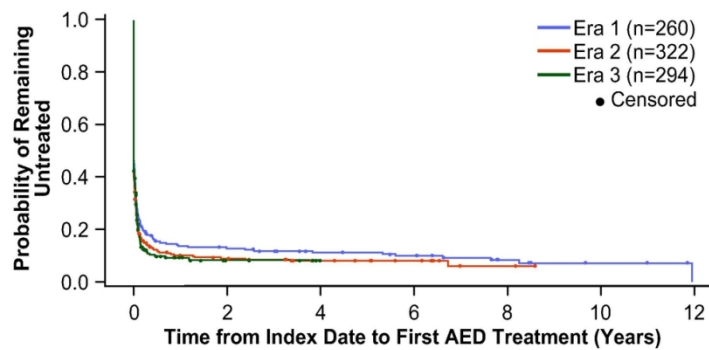

Figure 1. Time from first diagnosis to first AED prescription in A) adults (n=3861), B) children (n=527), and C) elderly (n=876).

84x142mm (300 x 300 DPI)

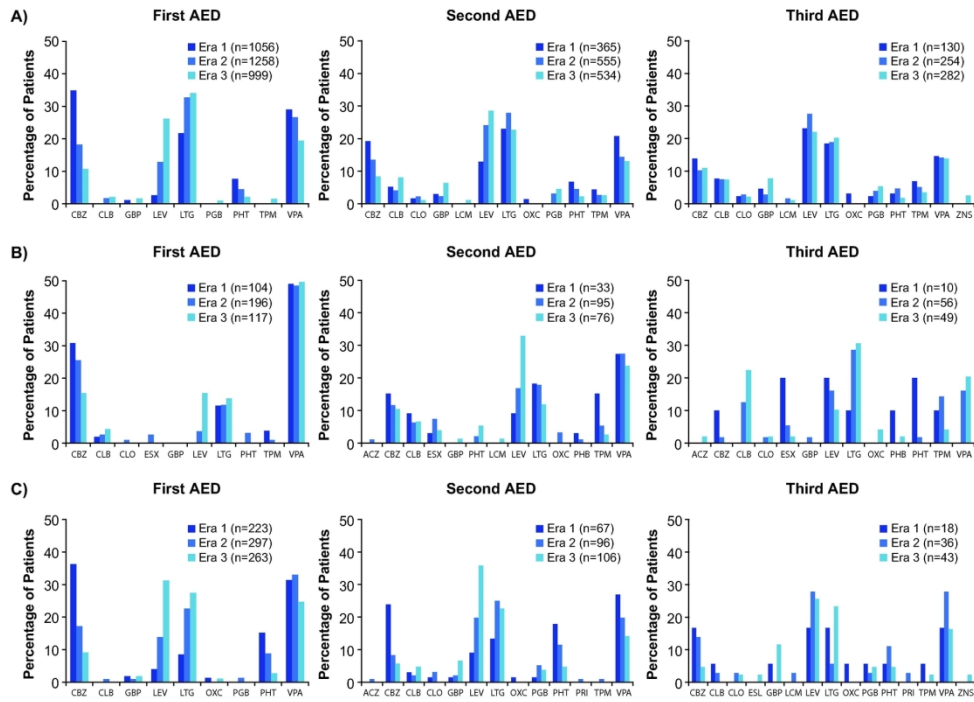

Figure 2. Treatment patterns by AED attempt in A) adults, B) children, and C) elderly.\*

175x123mm (300 x 300 DPI)



Figure 3. Treatment patterns in adult men and women for A) first-line, B) second-line, and C) third-line treatment.\*

139x125mm (300 x 300 DPI)



**SUPPLEMENTARY INFORMATION**

Trends in antiepileptic drug treatment and effectiveness in clinical practice in  
England from 2003 to 2016: a retrospective cohort study using electronic medical  
records

Graham Powell, John Logan, Victor Kiri, Simon Borghs

## Supplemental Tables

Supplementary Table S1 Diagnostic codes for epilepsy

| CODES                                                                    | TERM                                                                                                               | EPILEPSY TYPE |
|--------------------------------------------------------------------------|--------------------------------------------------------------------------------------------------------------------|---------------|
| <i>International Classification of Diseases, Tenth Revision (ICD-10)</i> |                                                                                                                    |               |
| G40                                                                      | Epilepsy                                                                                                           | Unspecified   |
| G40.0                                                                    | Localization-related (focal)(partial) idiopathic epilepsy and epileptic syndromes with seizures of localized onset | Partial       |
| G40.1                                                                    | Localization-related (focal)(partial) symptomatic epilepsy and epileptic syndromes with simple partial seizures    | Partial       |
| G40.2                                                                    | Localization-related (focal)(partial) symptomatic epilepsy and epileptic syndromes with complex partial seizures   | Partial       |
| G40.3                                                                    | Generalized idiopathic epilepsy and epileptic syndromes                                                            | Generalised   |
| G40.4                                                                    | Other generalized epilepsy and epileptic syndromes                                                                 | Generalised   |
| G40.5                                                                    | Special epileptic syndromes                                                                                        | Unspecified   |
| G40.6                                                                    | Grand mal seizures, unspecified (with or without petit mal)                                                        | Generalised   |
| G40.7                                                                    | Petit mal, unspecified, without grand mal seizures                                                                 | Unspecified   |
| G40.8                                                                    | Other epilepsy                                                                                                     | Unspecified   |
| G40.9                                                                    | Epilepsy, unspecified                                                                                              | Unspecified   |
| <b>READ codes</b>                                                        |                                                                                                                    |               |
| 1O30.00                                                                  | Epilepsy confirmed                                                                                                 | unspecified   |
| 667B.00                                                                  | Nocturnal epilepsy                                                                                                 | unspecified   |
| Eu80300                                                                  | [X]Acquired aphasia with epilepsy [Landau - Kleffner]                                                              | mixed         |
| Eu84200                                                                  | [X]Rett's syndrome                                                                                                 | generalised   |
| F035200                                                                  | Rasmussen syndrome                                                                                                 | partial       |
| F130600                                                                  | Aicardi Goutieres syndrome                                                                                         | mixed         |
| F132100                                                                  | Progressive myoclonic epilepsy                                                                                     | generalised   |
| F132111                                                                  | Unverricht - Lundborg disease                                                                                      | generalised   |
| F25..00                                                                  | Epilepsy                                                                                                           | unspecified   |
| F250.00                                                                  | Generalised nonconvulsive epilepsy                                                                                 | generalised   |
| F250000                                                                  | Petit mal (minor) epilepsy                                                                                         | unspecified   |
| F250100                                                                  | Pykno-epilepsy                                                                                                     | generalised   |
| F250400                                                                  | Juvenile absence epilepsy                                                                                          | generalised   |
| F250500                                                                  | Lennox-Gastaut syndrome                                                                                            | generalised   |
| F250y00                                                                  | Other specified generalised nonconvulsive epilepsy                                                                 | generalised   |
| F250z00                                                                  | Generalised nonconvulsive epilepsy NOS                                                                             | generalised   |
| F251.00                                                                  | Generalised convulsive epilepsy                                                                                    | generalised   |
| F251000                                                                  | Grand mal (major) epilepsy                                                                                         | generalised   |
| F251011                                                                  | Tonic-clonic epilepsy                                                                                              | generalised   |

| <b>CODES</b> | <b>TERM</b>                                                   | <b>EPILEPSY TYPE</b> |
|--------------|---------------------------------------------------------------|----------------------|
| F251100      | Neonatal myoclonic epilepsy                                   | generalised          |
| F251111      | Otohara syndrome                                              | mixed                |
| F251500      | Tonic-clonic epilepsy                                         | generalised          |
| F251y00      | Other specified generalised convulsive epilepsy               | generalised          |
| F251z00      | Generalised convulsive epilepsy NOS                           | generalised          |
| F254.00      | Partial epilepsy with impairment of consciousness             | partial              |
| F254000      | Temporal lobe epilepsy                                        | partial              |
| F254100      | Psychomotor epilepsy                                          | partial              |
| F254200      | Psychosensory epilepsy                                        | unspecified          |
| F254300      | Limbic system epilepsy                                        | partial              |
| F254z00      | Partial epilepsy with impairment of consciousness NOS         | partial              |
| F255.00      | Partial epilepsy without impairment of consciousness          | partial              |
| F255000      | Jacksonian, focal or motor epilepsy                           | partial              |
| F255011      | Focal epilepsy                                                | partial              |
| F255012      | Motor epilepsy                                                | partial              |
| F255100      | Sensory induced epilepsy                                      | unspecified          |
| F255200      | Somatosensory epilepsy                                        | partial              |
| F255300      | Visceral reflex epilepsy                                      | unspecified          |
| F255311      | Partial epilepsy with autonomic symptoms                      | partial              |
| F255400      | Visual reflex epilepsy                                        | unspecified          |
| F255500      | Unilateral epilepsy                                           | partial              |
| F255y00      | Partial epilepsy without impairment of consciousness OS       | partial              |
| F255z00      | Partial epilepsy without impairment of consciousness NOS      | partial              |
| F256.00      | Infantile spasms                                              | generalised          |
| F256.11      | Lightning spasms                                              | generalised          |
| F256.12      | West syndrome                                                 | generalised          |
| F256100      | Salaam attacks                                                | generalised          |
| F256z00      | Infantile spasms NOS                                          | generalised          |
| F259.00      | Early infant epileptic encephalopathy with suppression bursts | mixed                |
| F259.11      | Ohtahara syndrome                                             | mixed                |
| F25A.00      | Juvenile myoclonic epilepsy                                   | generalised          |
| F25B.00      | Alcohol-induced epilepsy                                      | unspecified          |
| F25C.00      | Drug-induced epilepsy                                         | unspecified          |
| F25D.00      | Menstrual epilepsy                                            | unspecified          |
| F25E.00      | Stress-induced epilepsy                                       | unspecified          |
| F25F.00      | Photosensitive epilepsy                                       | mixed                |
| F25G.00      | Severe myoclonic epilepsy in infancy                          | generalised          |
| F25G.11      | Dravet syndrome                                               | generalised          |

| <b>CODES</b> | <b>TERM</b>                                                  | <b>EPILEPSY TYPE</b> |
|--------------|--------------------------------------------------------------|----------------------|
| F25y.00      | Other forms of epilepsy                                      | unspecified          |
| F25y000      | Cursive (running) epilepsy                                   | partial              |
| F25y100      | Gelastic epilepsy                                            | partial              |
| F25y200      | Locl-rlt(foc)(part)idiop epilep&epilptic syn seiz locl onset | partial              |
| F25y400      | Benign Rolandic epilepsy                                     | partial              |
| F25y500      | Panayiotopoulos syndrome                                     | partial              |
| F25yz00      | Other forms of epilepsy NOS                                  | unspecified          |
| F25z.00      | Epilepsy NOS                                                 | unspecified          |
| Fyu5000      | [X]Other generalized epilepsy and epileptic syndromes        | generalised          |
| Fyu5100      | [X]Other epilepsy                                            | unspecified          |
| P228300      | Aicardi syndrome                                             | mixed                |
| PK61.00      | Sturge-Weber syndrome                                        | partial              |
| PKyz511      | Angelman syndrome                                            | generalised          |
| PKyz700      | Angelman's syndrome                                          | generalised          |
| PKyz711      | Angelman syndrome                                            | generalised          |
| SC20000      | Traumatic epilepsy                                           | partial              |
| ZS82.11      | Landau-Kleffner syndrome                                     | mixed                |

**Supplementary Table S2** READ codes used to capture the primary outcome

| CODE                                | TERM                                                |
|-------------------------------------|-----------------------------------------------------|
| <b>Active epilepsy and seizures</b> |                                                     |
| 1B1W.00                             | Transient epileptic amnesia                         |
| 1B27.00                             | Seizures in response to acute event                 |
| 1B64.00                             | Had a convulsion                                    |
| 1B64.11                             | Convulsion - symptom                                |
| 1B6B.00                             | Febrile convulsion                                  |
| 282..00                             | O/E - fit/convulsion                                |
| 282..11                             | O/E - a convulsion                                  |
| 282..13                             | O/E - a seizure                                     |
| 2827                                | O/E - febrile convulsion                            |
| 2828                                | Absence seizure                                     |
| 282Z.00                             | O/E - fit/convulsion NOS                            |
| 667D.00                             | Epilepsy control poor                               |
| 667Q.00                             | 1 to 12 seizures a year                             |
| 667R.00                             | 2 to 4 seizures a month                             |
| 667S.00                             | 1 to 7 seizures a week                              |
| 667T.00                             | Daily seizures                                      |
| 667V.00                             | Many seizures a day                                 |
| 667W.00                             | Emergency epilepsy treatment since last appointment |
| F132z12                             | Myoclonic seizure                                   |
| F250011                             | Epileptic absences                                  |
| F250200                             | Epileptic seizures - atonic                         |
| F250300                             | Epileptic seizures - akinetic                       |
| F251200                             | Epileptic seizures - clonic                         |
| F251300                             | Epileptic seizures - myoclonic                      |
| F251400                             | Epileptic seizures - tonic                          |
| F251600                             | Grand mal seizure                                   |
| F253.11                             | Status epilepticus                                  |
| F254400                             | Epileptic automatism                                |
| F254500                             | Complex partial epileptic seizure                   |
| F255600                             | Simple partial epileptic seizure                    |
| F25H.00                             | Generalised seizure                                 |
| F25X.00                             | Status epilepticus, unspecified                     |
| F25y300                             | Complex partial status epilepticus                  |
| F25z.11                             | Fit (in known epileptic) NOS                        |
| Fyu5200                             | [X]Other status epilepticus                         |
| Fyu5900                             | [X]Status epilepticus, unspecified                  |

| CODE    | TERM                                 |
|---------|--------------------------------------|
| Q480.00 | Convulsions in newborn               |
| Q480.12 | Seizures in newborn                  |
| R003.00 | [D]Convulsions                       |
| R003000 | [D]Convulsions, febrile              |
| R003011 | [D]Pyrexial convulsion               |
| R003100 | [D]Convulsions, infantile            |
| R003400 | [D]Nocturnal seizure                 |
| R003y00 | [D]Other specified convulsion        |
| R003z00 | [D]Convulsion NOS                    |
| R003z11 | [D]Seizure NOS                       |
| Ryu7100 | [X]Other and unspecified convulsions |
| 1B63.00 | Had a fit                            |
| 1B63.11 | Fit - had one, symptom               |
| 282..12 | O/E - a fit                          |
| 2822    | O/E - grand mal fit                  |
| 2823    | O/E - petit mal fit                  |
| 2824    | O/E - focal (Jacksonian) fit         |
| 2824.11 | O/E - Jacksonian fit                 |
| 2824.12 | O/E - focal fit                      |
| 2825    | O/E - psychomotor fit                |
| Q480.11 | Fits in newborn                      |
| R003200 | [D]Fit                               |
| F252.00 | Petit mal status                     |
| F253.00 | Grand mal status                     |
| F256.00 | Infantile spasms                     |
| F256.11 | Lightning spasms                     |
| F256z00 | Infantile spasms NOS                 |
| F256100 | Salaam attacks                       |

Supplementary Figures

Supplementary Figure S1 AED trends in boys and girls (<16 years of age) in A) first-line and B) second-line treatment.

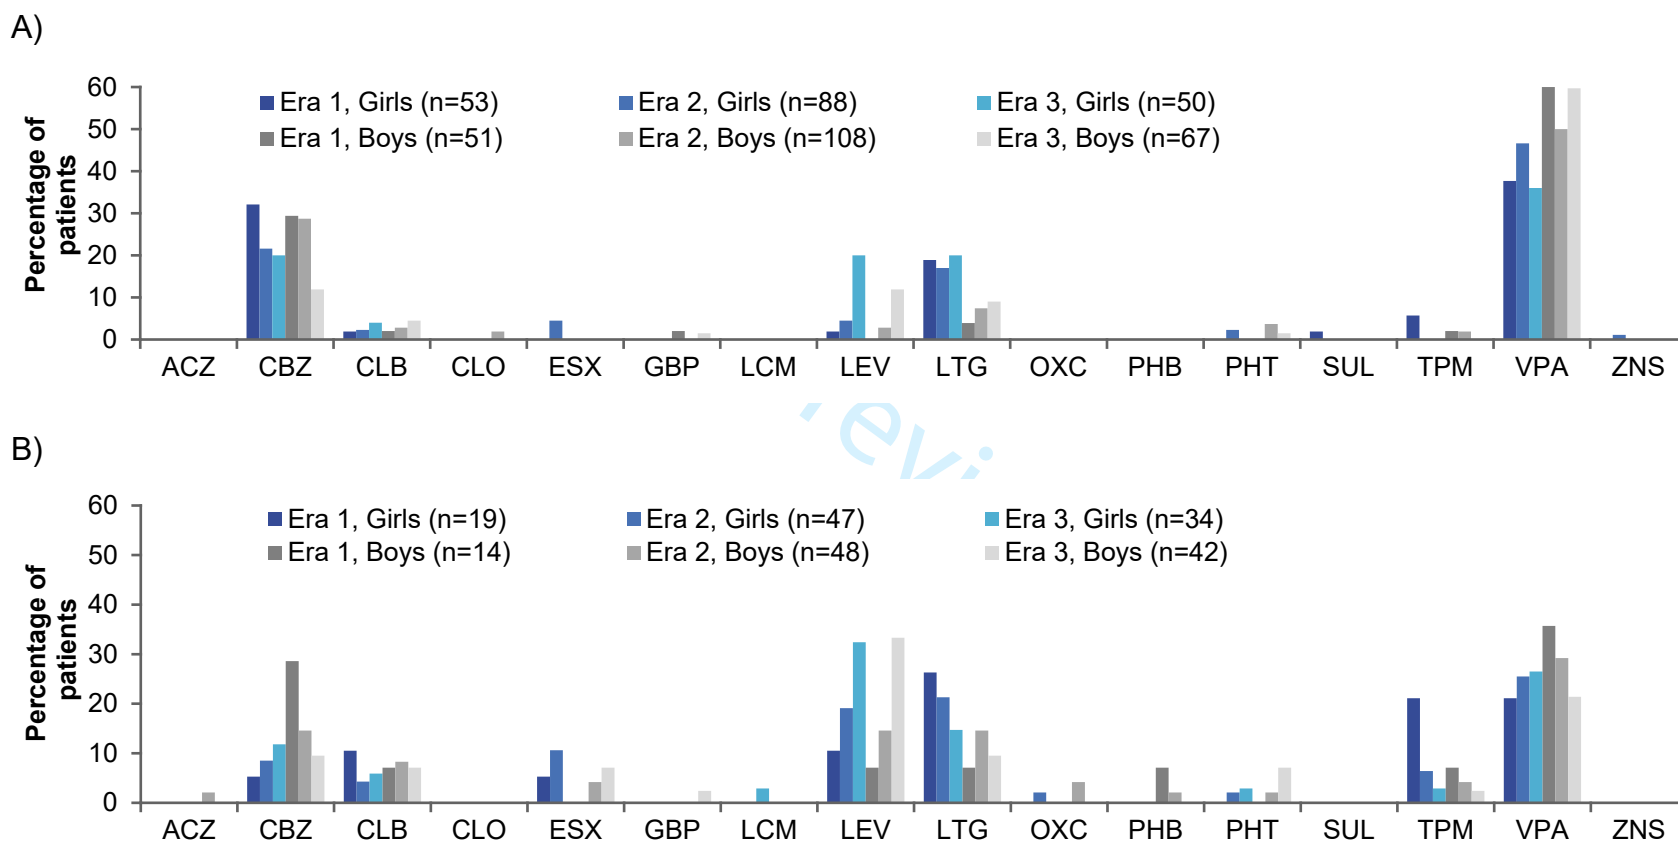

ACZ, acetazolamide; CBZ, carbamazepine; CLB, clobazam; CLO, clonazepam; GBP, gabapentin; LCM, lacosamide; LEV, levetiracetam; LTG, lamotrigine; OXC, oxcarbazepine; PGB, pregabalin; PHT, phenytoin; PRI, primidone; TPM, topiramate; VPA, valproate.

1  
2  
3  
4  
5  
6  
7  
8  
9  
10  
11  
12  
13  
14  
15  
16  
17  
18  
19  
20  
21  
22  
23  
24  
25  
26  
27  
28  
29  
30  
31  
32  
33  
34  
35  
36  
37  
38  
39  
40  
41  
42  
43  
44  
45  
46  
47

**Supplementary Figure S2** AED trends in elderly men and women (≥65 years of age) in A) first-line and B) second-line treatment.

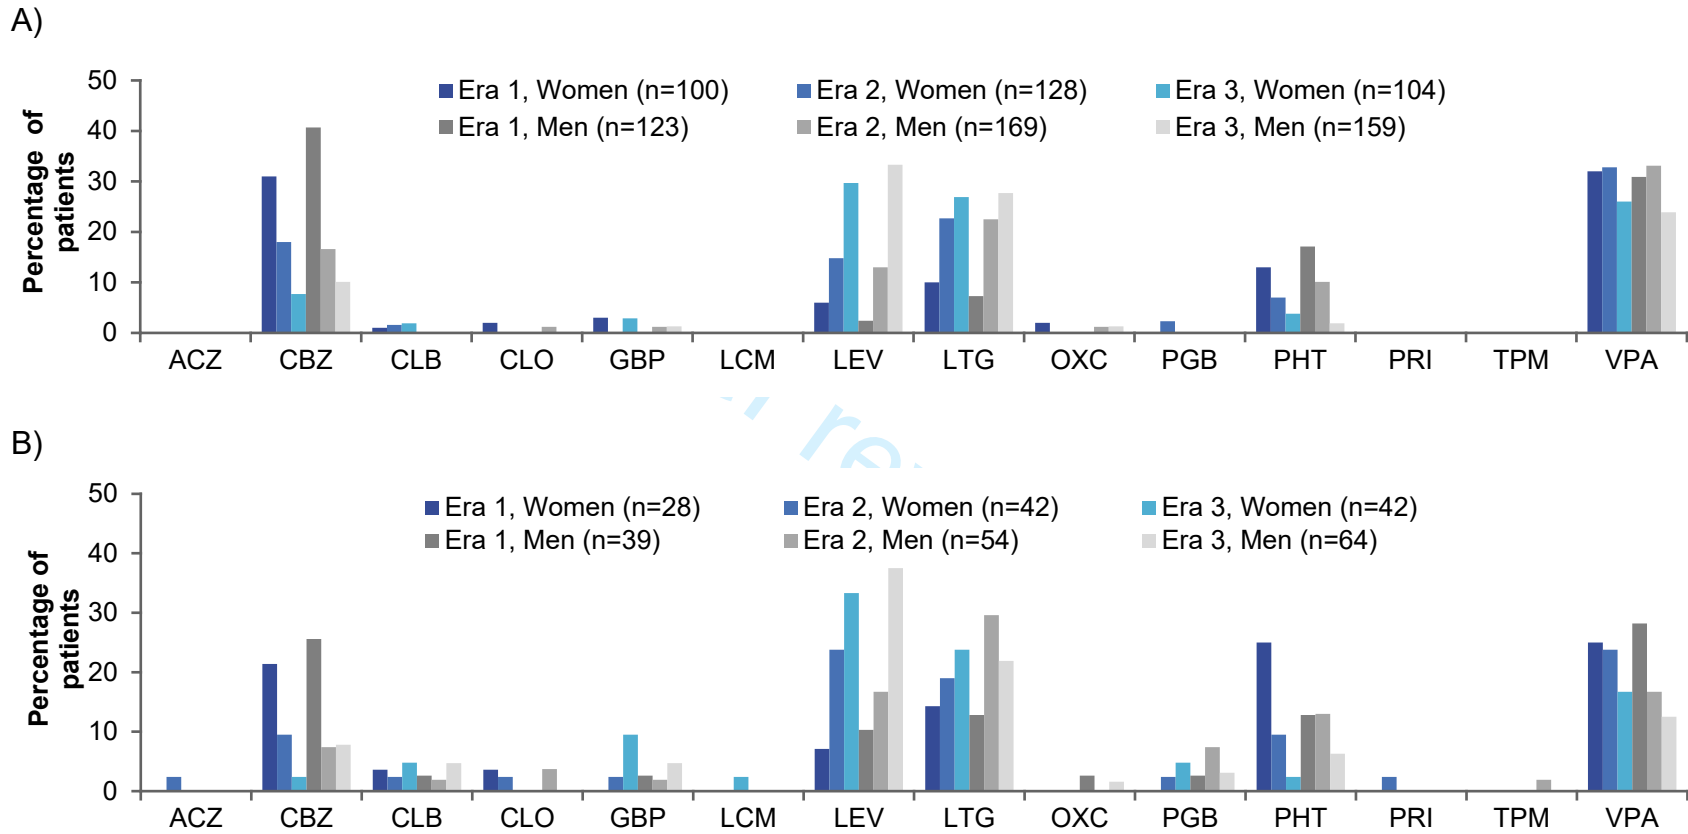

ACZ, acetazolamide; CBZ, carbamazepine; CLB, clobazam; CLO, clonazepam; GBP, gabapentin; LCM, lacosamide; LEV, levetiracetam; LTG, lamotrigine; OXC, oxcarbazepine; PGB, pregabalin; PHT, phenytoin; PRI, primidone; TPM, topiramate; VPA, valproate.



STROBE Statement—Checklist of items that should be included in reports of *cohort studies*

|                              | Item No | Recommendation                                                                                                                                                                                                                                                                                                         | Page No                       |
|------------------------------|---------|------------------------------------------------------------------------------------------------------------------------------------------------------------------------------------------------------------------------------------------------------------------------------------------------------------------------|-------------------------------|
| <b>Title and abstract</b>    | 1       | (a) Indicate the study's design with a commonly used term in the title or the abstract<br>(b) Provide in the abstract an informative and balanced summary of what was done and what was found                                                                                                                          | 1-2<br>2                      |
| <b>Introduction</b>          |         |                                                                                                                                                                                                                                                                                                                        |                               |
| Background/rationale         | 2       | Explain the scientific background and rationale for the investigation being reported                                                                                                                                                                                                                                   | 4                             |
| Objectives                   | 3       | State specific objectives, including any prespecified hypotheses                                                                                                                                                                                                                                                       | 4                             |
| <b>Methods</b>               |         |                                                                                                                                                                                                                                                                                                                        |                               |
| Study design                 | 4       | Present key elements of study design early in the paper                                                                                                                                                                                                                                                                | 4-5                           |
| Setting                      | 5       | Describe the setting, locations, and relevant dates, including periods of recruitment, exposure, follow-up, and data collection                                                                                                                                                                                        | 4-6                           |
| Participants                 | 6       | (a) Give the eligibility criteria, and the sources and methods of selection of participants. Describe methods of follow-up<br>(b) For matched studies, give matching criteria and number of exposed and unexposed                                                                                                      | 5-6<br>N/A                    |
| Variables                    | 7       | Clearly define all outcomes, exposures, predictors, potential confounders, and effect modifiers. Give diagnostic criteria, if applicable                                                                                                                                                                               | 5-7                           |
| Data sources/<br>measurement | 8*      | For each variable of interest, give sources of data and details of methods of assessment (measurement). Describe comparability of assessment methods if there is more than one group                                                                                                                                   | 4-7                           |
| Bias                         | 9       | Describe any efforts to address potential sources of bias                                                                                                                                                                                                                                                              | N/A                           |
| Study size                   | 10      | Explain how the study size was arrived at                                                                                                                                                                                                                                                                              | 5-6                           |
| Quantitative variables       | 11      | Explain how quantitative variables were handled in the analyses. If applicable, describe which groupings were chosen and why                                                                                                                                                                                           | N/A                           |
| Statistical methods          | 12      | (a) Describe all statistical methods, including those used to control for confounding<br>(b) Describe any methods used to examine subgroups and interactions<br>(c) Explain how missing data were addressed<br>(d) If applicable, explain how loss to follow-up was addressed<br>(e) Describe any sensitivity analyses | 6<br>N/A<br>N/A<br>N/A<br>N/A |
| <b>Results</b>               |         |                                                                                                                                                                                                                                                                                                                        |                               |
| Participants                 | 13*     | (a) Report numbers of individuals at each stage of study—eg numbers potentially eligible, examined for eligibility, confirmed eligible, included in the study, completing follow-up, and analysed<br>(b) Give reasons for non-participation at each stage<br>(c) Consider use of a flow diagram                        | 7<br>N/A<br>N/A               |
| Descriptive data             | 14*     | (a) Give characteristics of study participants (eg demographic, clinical, social) and information on exposures and potential confounders<br>(b) Indicate number of participants with missing data for each variable of interest<br>(c) Summarise follow-up time (eg, average and total amount)                         | 7-9<br>N/A<br>9               |
| Outcome data                 | 15*     | Report numbers of outcome events or summary measures over time                                                                                                                                                                                                                                                         | 10-13                         |

|    |                          |    |                                                                                                                                                                                                              |       |
|----|--------------------------|----|--------------------------------------------------------------------------------------------------------------------------------------------------------------------------------------------------------------|-------|
| 1  | Main results             | 16 | (a) Give unadjusted estimates and, if applicable, confounder-adjusted estimates and their precision (eg, 95% confidence interval). Make clear which confounders were adjusted for and why they were included | 10-13 |
| 2  |                          |    | (b) Report category boundaries when continuous variables were categorized                                                                                                                                    | N/A   |
| 3  |                          |    | (c) If relevant, consider translating estimates of relative risk into absolute risk for a meaningful time period                                                                                             | N/A   |
| 4  |                          |    |                                                                                                                                                                                                              |       |
| 5  |                          |    |                                                                                                                                                                                                              |       |
| 6  |                          |    |                                                                                                                                                                                                              |       |
| 7  |                          |    |                                                                                                                                                                                                              |       |
| 8  |                          |    |                                                                                                                                                                                                              |       |
| 9  | Other analyses           | 17 | Report other analyses done—eg analyses of subgroups and interactions, and sensitivity analyses                                                                                                               | N/A   |
| 10 |                          |    |                                                                                                                                                                                                              |       |
| 11 | <b>Discussion</b>        |    |                                                                                                                                                                                                              |       |
| 12 |                          |    |                                                                                                                                                                                                              |       |
| 13 | Key results              | 18 | Summarise key results with reference to study objectives                                                                                                                                                     | 13-15 |
| 14 |                          |    |                                                                                                                                                                                                              |       |
| 15 | Limitations              | 19 | Discuss limitations of the study, taking into account sources of potential bias or imprecision. Discuss both direction and magnitude of any potential bias                                                   | 16-17 |
| 16 |                          |    |                                                                                                                                                                                                              |       |
| 17 | Interpretation           | 20 | Give a cautious overall interpretation of results considering objectives, limitations, multiplicity of analyses, results from similar studies, and other relevant evidence                                   | 17    |
| 18 |                          |    |                                                                                                                                                                                                              |       |
| 19 |                          |    |                                                                                                                                                                                                              |       |
| 20 | Generalisability         | 21 | Discuss the generalisability (external validity) of the study results                                                                                                                                        | 17-18 |
| 21 |                          |    |                                                                                                                                                                                                              |       |
| 22 | <b>Other information</b> |    |                                                                                                                                                                                                              |       |
| 23 |                          |    |                                                                                                                                                                                                              |       |
| 24 | Funding                  | 22 | Give the source of funding and the role of the funders for the present study and, if applicable, for the original study on which the present article is based                                                | 18    |
| 25 |                          |    |                                                                                                                                                                                                              |       |

26  
27 \*Give information separately for exposed and unexposed groups.

28  
29  
30 **Note:** An Explanation and Elaboration article discusses each checklist item and gives methodological background and published examples of transparent reporting. The STROBE checklist is best used in conjunction with this article (freely available on the Web sites of PLoS Medicine at <http://www.plosmedicine.org/>, Annals of Internal Medicine at <http://www.annals.org/>, and Epidemiology at <http://www.epidem.com/>). Information on the STROBE Initiative is available at <http://www.strobe-statement.org>.

31  
32  
33  
34  
35  
36  
37  
38  
39  
40  
41  
42  
43  
44  
45  
46  
47  
48  
49  
50  
51  
52  
53  
54  
55  
56  
57  
58  
59  
60
