# Supplementary material for: Trends in antiepileptic drug treatment and effectiveness in clinical practice in England from 2003 to 2016: a retrospective cohort study using electronic medical records
Source: PubMed Central journal article supplement — BMJ Open. 2019 Dec 16;9(12):e032551. doi: 10.1136/bmjopen-2019-032551 (PMC6936987; doi:10.1136/bmjopen-2019-032551), 2019-12-16
Supplement: bmjopen-2019-032551supp001.pdf [file bmjopen-2019-032551supp001.pdf]

**SUPPLEMENTARY INFORMATION**

Trends in antiepileptic drug treatment and effectiveness in clinical practice in England from 2003 to 2016: a retrospective cohort study using electronic medical records

Graham Powell, John Logan, Victor Kiri, Simon Borghs

*BMJ Open*

<https://doi.org/bmjopen-2019-032551>

## Supplemental Tables

Supplementary Table S1 Diagnostic codes for epilepsy

| CODES                                                                    | TERM                                                                                                               | EPILEPSY TYPE |
|--------------------------------------------------------------------------|--------------------------------------------------------------------------------------------------------------------|---------------|
| <b>International Classification of Diseases, Tenth Revision (ICD-10)</b> |                                                                                                                    |               |
| G40                                                                      | Epilepsy                                                                                                           | Unspecified   |
| G40.0                                                                    | Localisation-related (focal)(partial) idiopathic epilepsy and epileptic syndromes with seizures of localised onset | Partial       |
| G40.1                                                                    | Localisation-related (focal)(partial) symptomatic epilepsy and epileptic syndromes with simple partial seizures    | Partial       |
| G40.2                                                                    | Localisation-related (focal)(partial) symptomatic epilepsy and epileptic syndromes with complex partial seizures   | Partial       |
| G40.3                                                                    | Generalised idiopathic epilepsy and epileptic syndromes                                                            | Generalised   |
| G40.4                                                                    | Other generalised epilepsy and epileptic syndromes                                                                 | Generalised   |
| G40.5                                                                    | Special epileptic syndromes                                                                                        | Unspecified   |
| G40.6                                                                    | Grand mal seizures, unspecified (with or without petit mal)                                                        | Generalised   |
| G40.7                                                                    | Petit mal, unspecified, without grand mal seizures                                                                 | Unspecified   |
| G40.8                                                                    | Other epilepsy                                                                                                     | Unspecified   |
| G40.9                                                                    | Epilepsy, unspecified                                                                                              | Unspecified   |
| <b>READ codes</b>                                                        |                                                                                                                    |               |
| 1O30.00                                                                  | Epilepsy confirmed                                                                                                 | unspecified   |
| 667B.00                                                                  | Nocturnal epilepsy                                                                                                 | unspecified   |
| Eu80300                                                                  | [X]Acquired aphasia with epilepsy [Landau - Kleffner]                                                              | mixed         |
| Eu84200                                                                  | [X]Rett's syndrome                                                                                                 | generalised   |
| F035200                                                                  | Rasmussen syndrome                                                                                                 | partial       |
| F130600                                                                  | Aicardi Goutieres syndrome                                                                                         | mixed         |
| F132100                                                                  | Progressive myoclonic epilepsy                                                                                     | generalised   |
| F132111                                                                  | Unverricht - Lundborg disease                                                                                      | generalised   |
| F25..00                                                                  | Epilepsy                                                                                                           | unspecified   |
| F250.00                                                                  | Generalised nonconvulsive epilepsy                                                                                 | generalised   |
| F250000                                                                  | Petit mal (minor) epilepsy                                                                                         | unspecified   |
| F250100                                                                  | Pykno-epilepsy                                                                                                     | generalised   |
| F250400                                                                  | Juvenile absence epilepsy                                                                                          | generalised   |
| F250500                                                                  | Lennox-Gastaut syndrome                                                                                            | generalised   |
| F250y00                                                                  | Other specified generalised nonconvulsive epilepsy                                                                 | generalised   |
| F250z00                                                                  | Generalised nonconvulsive epilepsy NOS                                                                             | generalised   |
| F251.00                                                                  | Generalised convulsive epilepsy                                                                                    | generalised   |
| F251000                                                                  | Grand mal (major) epilepsy                                                                                         | generalised   |
| F251011                                                                  | Tonic-clonic epilepsy                                                                                              | generalised   |

| <b>CODES</b> | <b>TERM</b>                                                   | <b>EPILEPSY TYPE</b> |
|--------------|---------------------------------------------------------------|----------------------|
| F251100      | Neonatal myoclonic epilepsy                                   | generalised          |
| F251111      | Otohara syndrome                                              | mixed                |
| F251500      | Tonic-clonic epilepsy                                         | generalised          |
| F251y00      | Other specified generalised convulsive epilepsy               | generalised          |
| F251z00      | Generalised convulsive epilepsy NOS                           | generalised          |
| F254.00      | Partial epilepsy with impairment of consciousness             | partial              |
| F254000      | Temporal lobe epilepsy                                        | partial              |
| F254100      | Psychomotor epilepsy                                          | partial              |
| F254200      | Psychosensory epilepsy                                        | unspecified          |
| F254300      | Limbic system epilepsy                                        | partial              |
| F254z00      | Partial epilepsy with impairment of consciousness NOS         | partial              |
| F255.00      | Partial epilepsy without impairment of consciousness          | partial              |
| F255000      | Jacksonian, focal or motor epilepsy                           | partial              |
| F255011      | Focal epilepsy                                                | partial              |
| F255012      | Motor epilepsy                                                | partial              |
| F255100      | Sensory induced epilepsy                                      | unspecified          |
| F255200      | Somatosensory epilepsy                                        | partial              |
| F255300      | Visceral reflex epilepsy                                      | unspecified          |
| F255311      | Partial epilepsy with autonomic symptoms                      | partial              |
| F255400      | Visual reflex epilepsy                                        | unspecified          |
| F255500      | Unilateral epilepsy                                           | partial              |
| F255y00      | Partial epilepsy without impairment of consciousness OS       | partial              |
| F255z00      | Partial epilepsy without impairment of consciousness NOS      | partial              |
| F256.00      | Infantile spasms                                              | generalised          |
| F256.11      | Lightning spasms                                              | generalised          |
| F256.12      | West syndrome                                                 | generalised          |
| F256100      | Salaam attacks                                                | generalised          |
| F256z00      | Infantile spasms NOS                                          | generalised          |
| F259.00      | Early infant epileptic encephalopathy with suppression bursts | mixed                |
| F259.11      | Ohtahara syndrome                                             | mixed                |
| F25A.00      | Juvenile myoclonic epilepsy                                   | generalised          |
| F25B.00      | Alcohol-induced epilepsy                                      | unspecified          |
| F25C.00      | Drug-induced epilepsy                                         | unspecified          |
| F25D.00      | Menstrual epilepsy                                            | unspecified          |
| F25E.00      | Stress-induced epilepsy                                       | unspecified          |
| F25F.00      | Photosensitive epilepsy                                       | mixed                |
| F25G.00      | Severe myoclonic epilepsy in infancy                          | generalised          |
| F25G.11      | Dravet syndrome                                               | generalised          |

| <b>CODES</b> | <b>TERM</b>                                                  | <b>EPILEPSY TYPE</b> |
|--------------|--------------------------------------------------------------|----------------------|
| F25y.00      | Other forms of epilepsy                                      | unspecified          |
| F25y000      | Cursive (running) epilepsy                                   | partial              |
| F25y100      | Gelastic epilepsy                                            | partial              |
| F25y200      | Locl-rlt(foc)(part)idiop epilep&epilptic syn seiz locl onset | partial              |
| F25y400      | Benign Rolandic epilepsy                                     | partial              |
| F25y500      | Panayiotopoulos syndrome                                     | partial              |
| F25yz00      | Other forms of epilepsy NOS                                  | unspecified          |
| F25z.00      | Epilepsy NOS                                                 | unspecified          |
| Fyu5000      | [X]Other generalised epilepsy and epileptic syndromes        | generalised          |
| Fyu5100      | [X]Other epilepsy                                            | unspecified          |
| P228300      | Aicardi syndrome                                             | mixed                |
| PK61.00      | Sturge-Weber syndrome                                        | partial              |
| PKyz511      | Angelman syndrome                                            | generalised          |
| PKyz700      | Angelman's syndrome                                          | generalised          |
| PKyz711      | Angelman syndrome                                            | generalised          |
| SC20000      | Traumatic epilepsy                                           | partial              |
| ZS82.11      | Landau-Kleffner syndrome                                     | mixed                |

**Supplementary Table S2** READ codes used to capture the primary outcome

| CODE                                | TERM                                                |
|-------------------------------------|-----------------------------------------------------|
| <b>Active epilepsy and seizures</b> |                                                     |
| 1B1W.00                             | Transient epileptic amnesia                         |
| 1B27.00                             | Seizures in response to acute event                 |
| 1B64.00                             | Had a convulsion                                    |
| 1B64.11                             | Convulsion - symptom                                |
| 1B6B.00                             | Febrile convulsion                                  |
| 282..00                             | O/E - fit/convulsion                                |
| 282..11                             | O/E - a convulsion                                  |
| 282..13                             | O/E - a seizure                                     |
| 2827                                | O/E - febrile convulsion                            |
| 2828                                | Absence seizure                                     |
| 282Z.00                             | O/E - fit/convulsion NOS                            |
| 667D.00                             | Epilepsy control poor                               |
| 667Q.00                             | 1 to 12 seizures a year                             |
| 667R.00                             | 2 to 4 seizures a month                             |
| 667S.00                             | 1 to 7 seizures a week                              |
| 667T.00                             | Daily seizures                                      |
| 667V.00                             | Many seizures a day                                 |
| 667W.00                             | Emergency epilepsy treatment since last appointment |
| F132z12                             | Myoclonic seizure                                   |
| F250011                             | Epileptic absences                                  |
| F250200                             | Epileptic seizures - atonic                         |
| F250300                             | Epileptic seizures - akinetic                       |
| F251200                             | Epileptic seizures - clonic                         |
| F251300                             | Epileptic seizures - myoclonic                      |
| F251400                             | Epileptic seizures - tonic                          |
| F251600                             | Grand mal seizure                                   |
| F253.11                             | Status epilepticus                                  |
| F254400                             | Epileptic automatism                                |
| F254500                             | Complex partial epileptic seizure                   |
| F255600                             | Simple partial epileptic seizure                    |
| F25H.00                             | Generalised seizure                                 |
| F25X.00                             | Status epilepticus, unspecified                     |
| F25y300                             | Complex partial status epilepticus                  |
| F25z.11                             | Fit (in known epileptic) NOS                        |
| Fyu5200                             | [X]Other status epilepticus                         |
| Fyu5900                             | [X]Status epilepticus, unspecified                  |

| <b>CODE</b> | <b>TERM</b>                          |
|-------------|--------------------------------------|
| Q480.00     | Convulsions in newborn               |
| Q480.12     | Seizures in newborn                  |
| R003.00     | [D]Convulsions                       |
| R003000     | [D]Convulsions, febrile              |
| R003011     | [D]Pyrexial convulsion               |
| R003100     | [D]Convulsions, infantile            |
| R003400     | [D]Nocturnal seizure                 |
| R003y00     | [D]Other specified convulsion        |
| R003z00     | [D]Convulsion NOS                    |
| R003z11     | [D]Seizure NOS                       |
| Ryu7100     | [X]Other and unspecified convulsions |
| 1B63.00     | Had a fit                            |
| 1B63.11     | Fit - had one, symptom               |
| 282..12     | O/E - a fit                          |
| 2822        | O/E - grand mal fit                  |
| 2823        | O/E - petit mal fit                  |
| 2824        | O/E - focal (Jacksonian) fit         |
| 2824.11     | O/E - Jacksonian fit                 |
| 2824.12     | O/E - focal fit                      |
| 2825        | O/E - psychomotor fit                |
| Q480.11     | Fits in newborn                      |
| R003200     | [D]Fit                               |
| F252.00     | Petit mal status                     |
| F253.00     | Grand mal status                     |
| F256.00     | Infantile spasms                     |
| F256.11     | Lightning spasms                     |
| F256z00     | Infantile spasms NOS                 |
| F256100     | Salaam attacks                       |

## Supplementary Figures

Supplementary Figure S1 AED trends in boys and girls (&lt;16 years of age) in A) first-line and B) second-line treatment.

A)

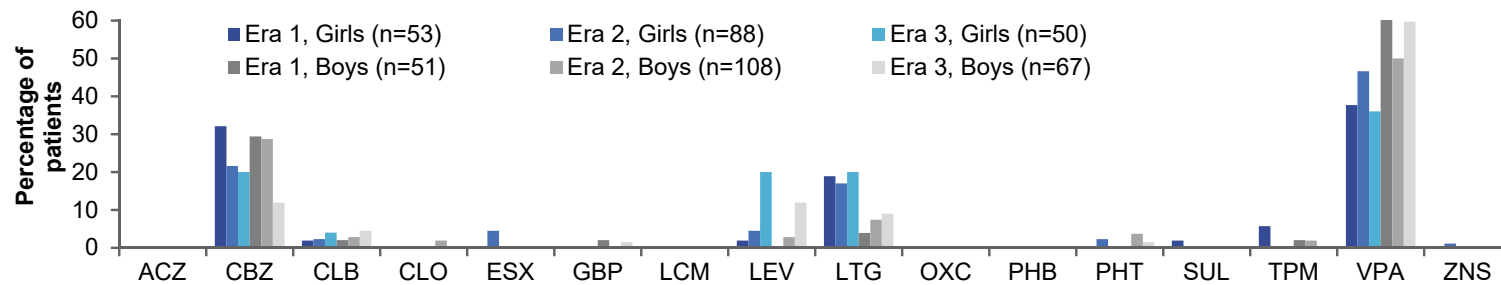

B)

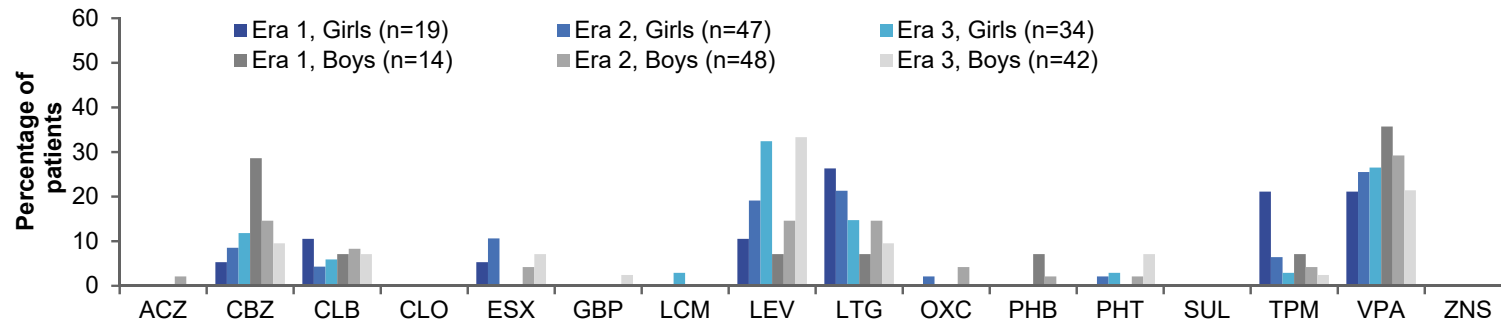

ACZ, acetazolamide; CBZ, carbamazepine; CLB, clobazam; CLO, clonazepam; GBP, gabapentin; LCM, lacosamide; LEV, levetiracetam; LTG, lamotrigine; OXC, oxcarbazepine; PGB, pregabalin; PHT, phenytoin; PRI, primidone; TPM, topiramate; VPA, valproate.

**Supplementary Figure S2** AED trends in elderly men and women ( $\geq 65$  years of age) in A) first-line and B) second-line treatment.

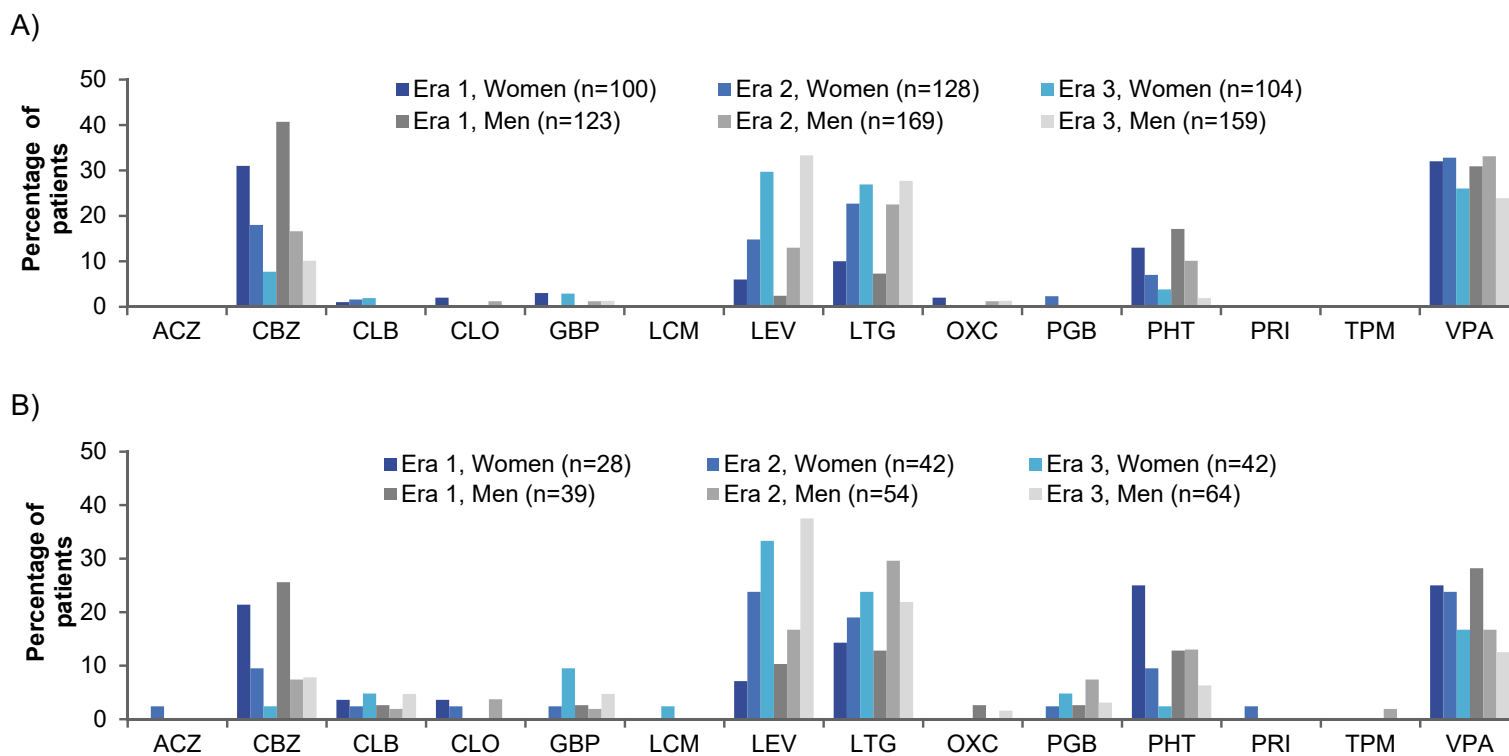

ACZ, acetazolamide; CBZ, carbamazepine; CLB, clobazam; CLO, clonazepam; GBP, gabapentin; LCM, lacosamide; LEV, levetiracetam; LTG, lamotrigine; OXC, oxcarbazepine; PGB, pregabalin; PHT, phenytoin; PRI, primidone; TPM, topiramate; VPA, valproate.
